# Supplementary material
Source: MDPI journal article supplement (https://www.mdpi.com/2071-1050/16/8/3262)

**Figure S2.** Time series graph of Multi Model Ensemble for precipitation, maximum and minimum temperatures.

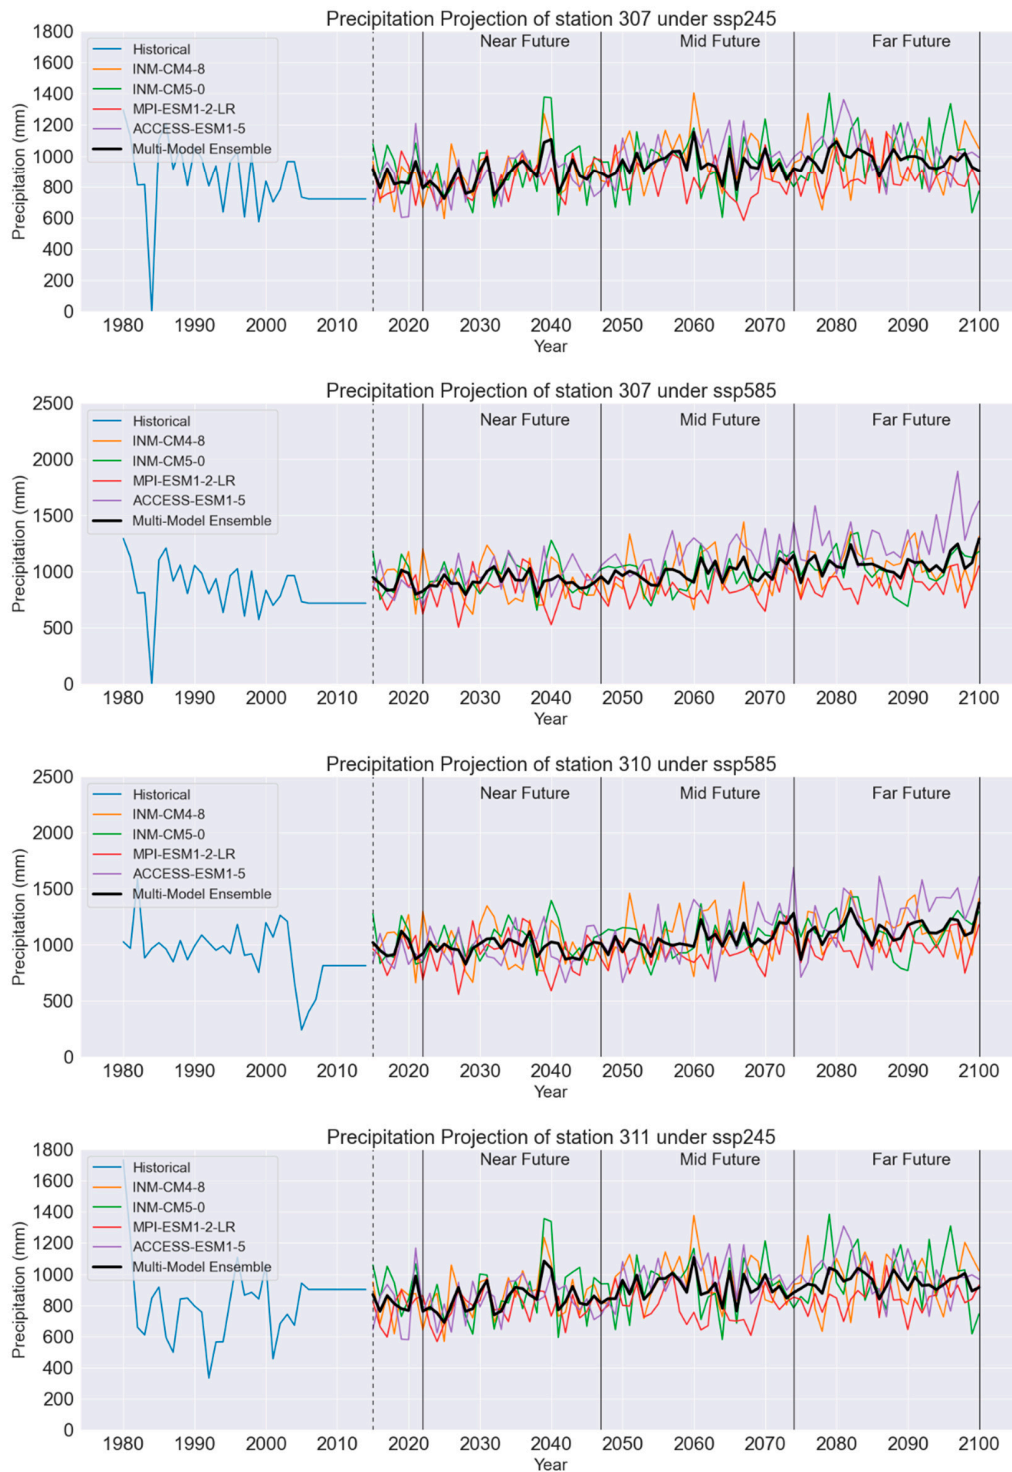

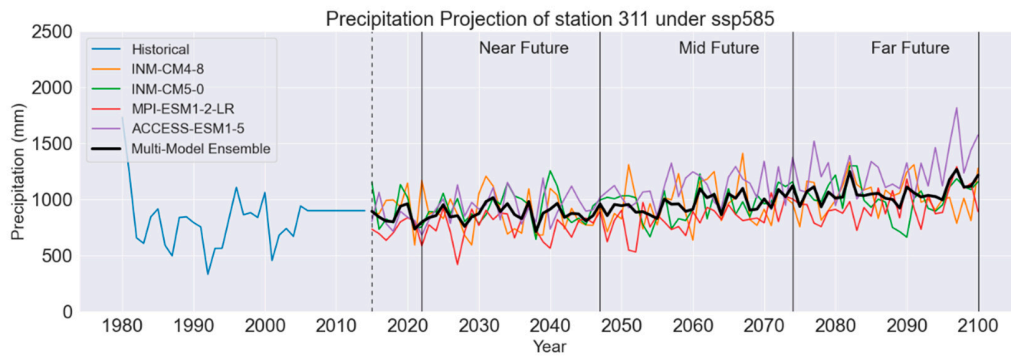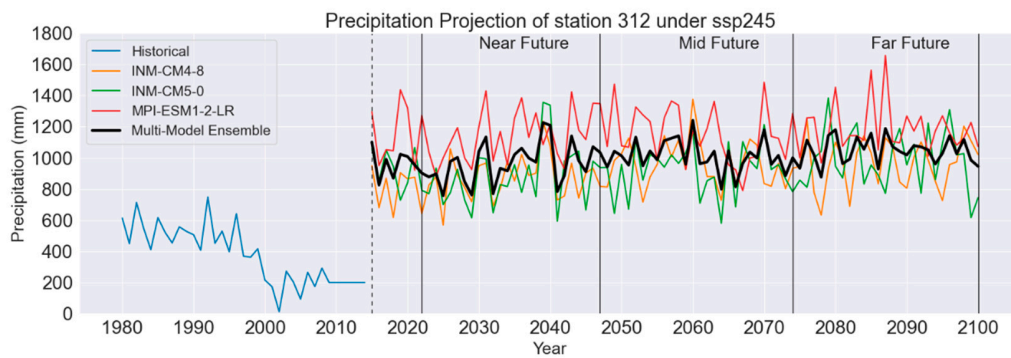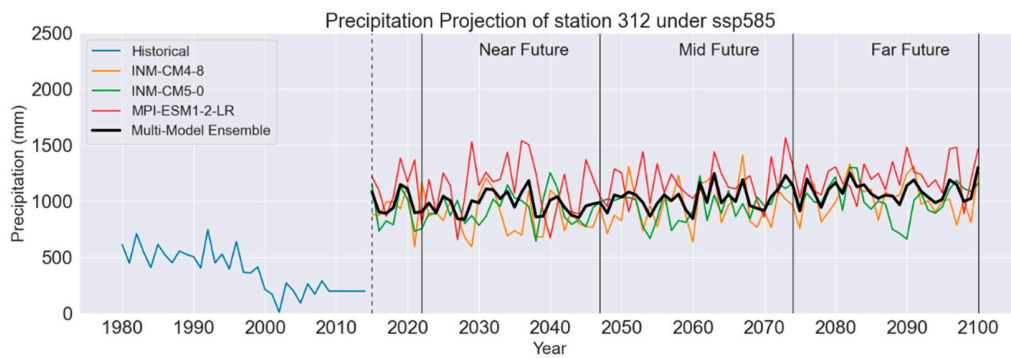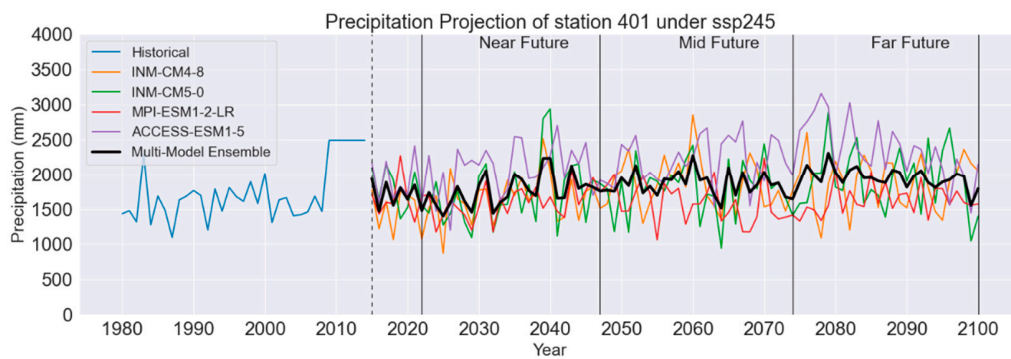

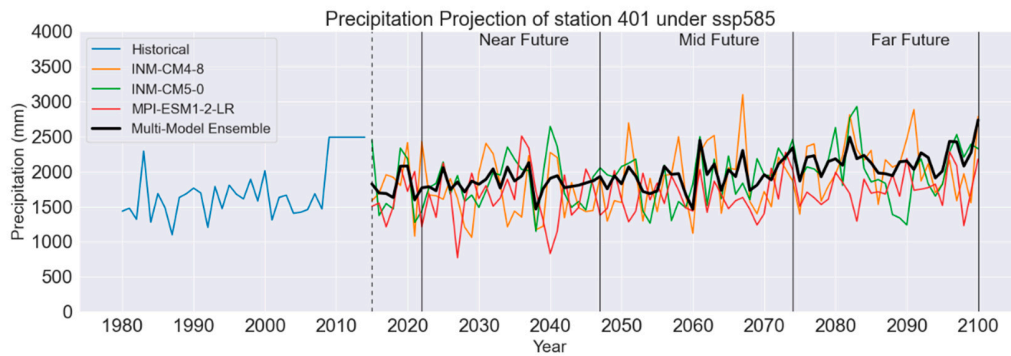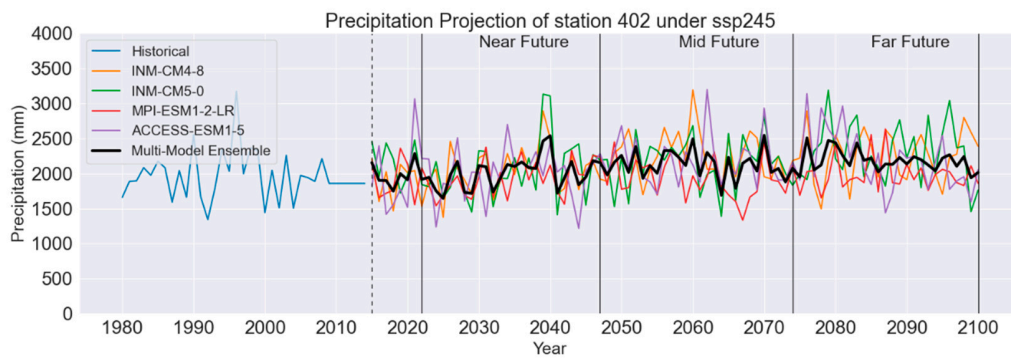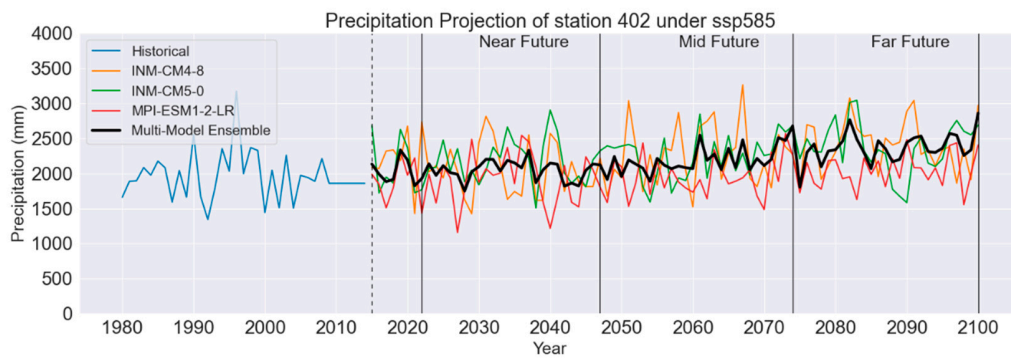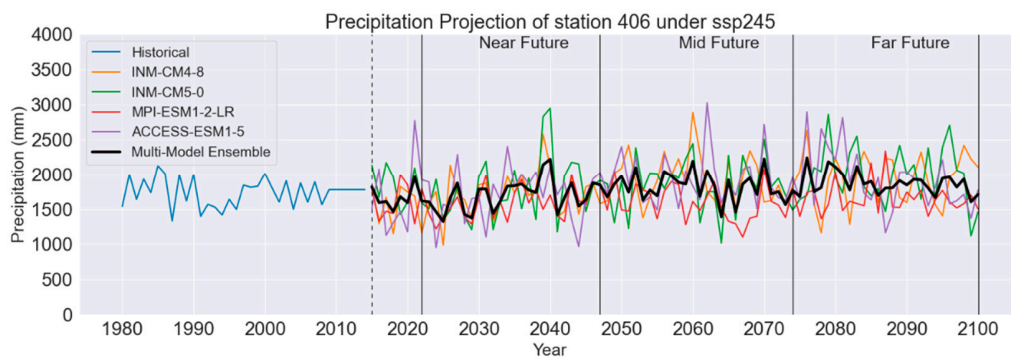

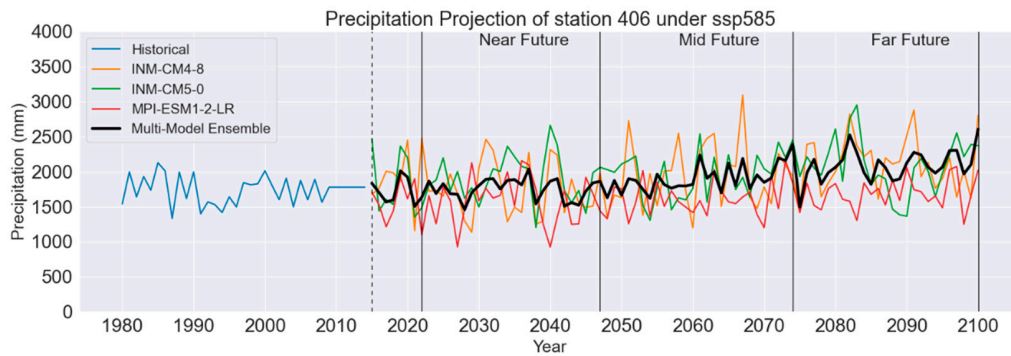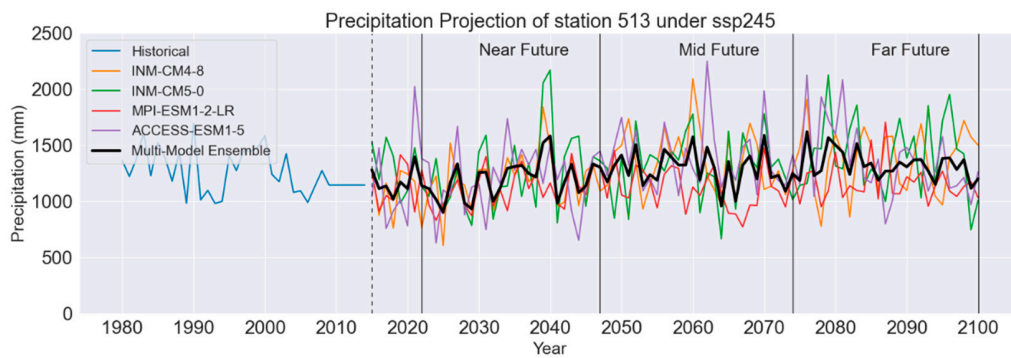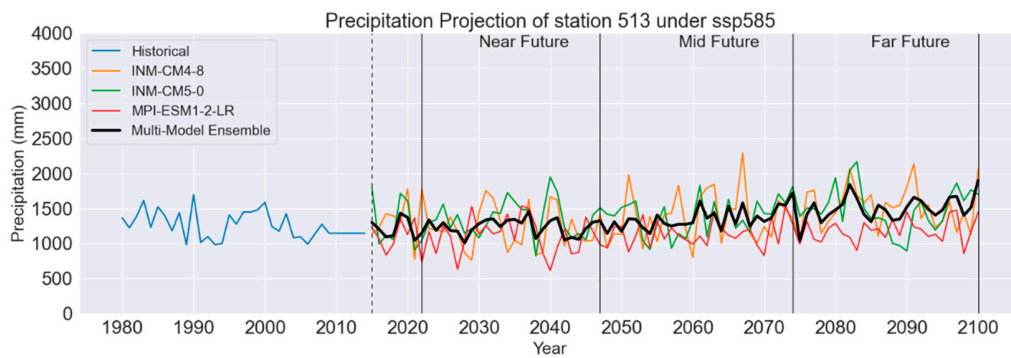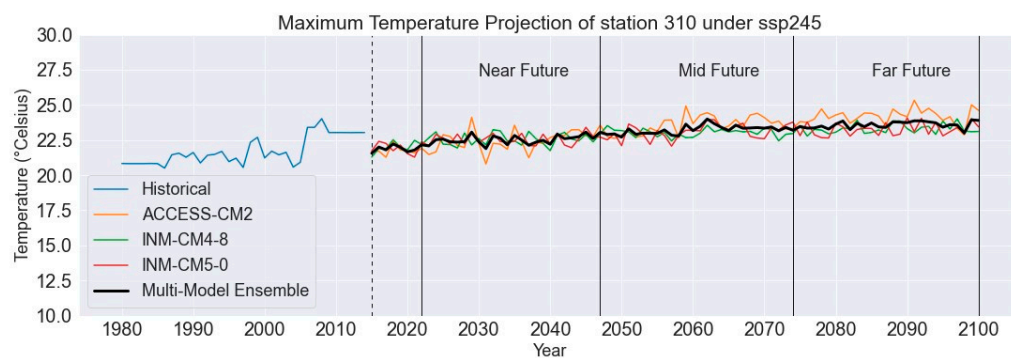



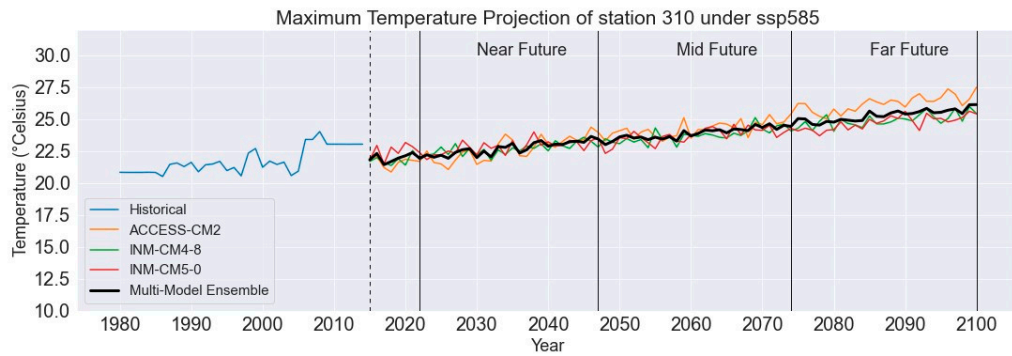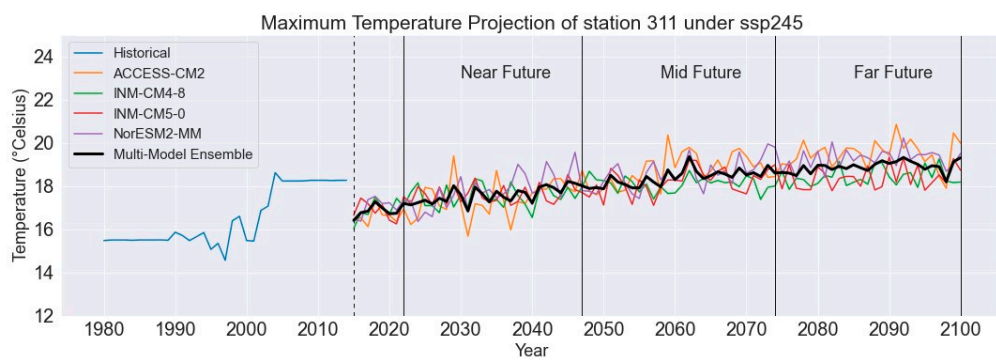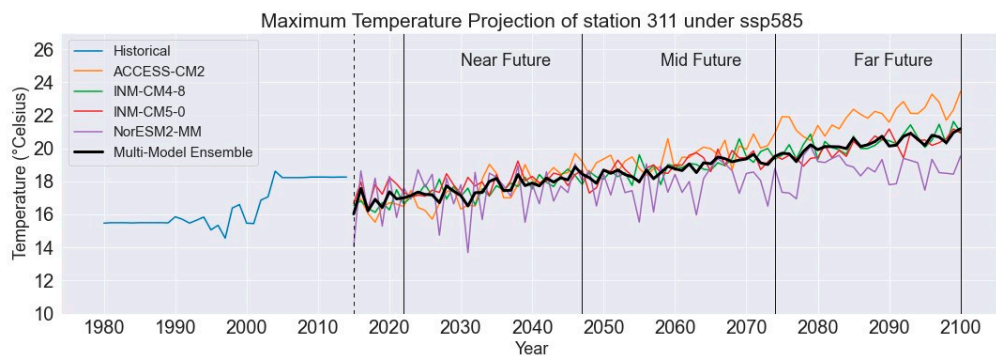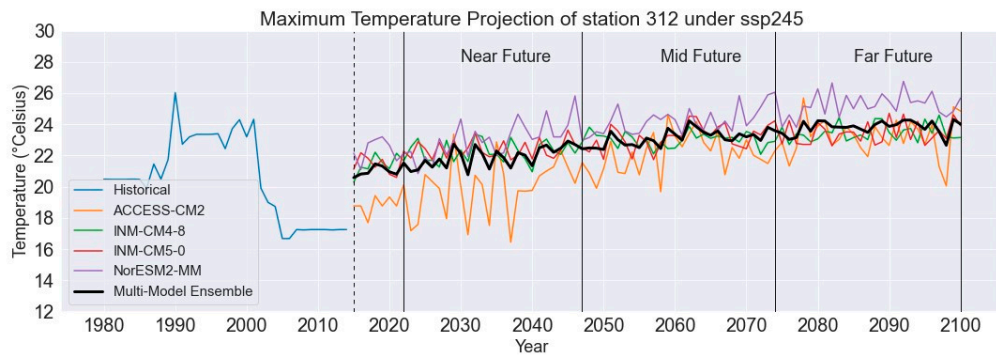

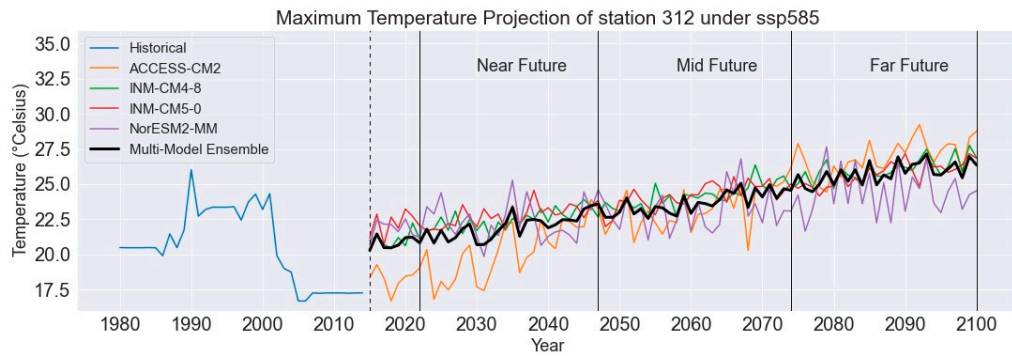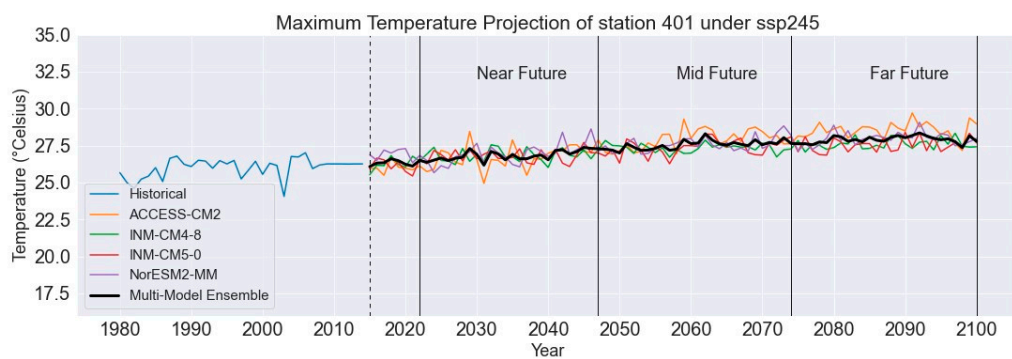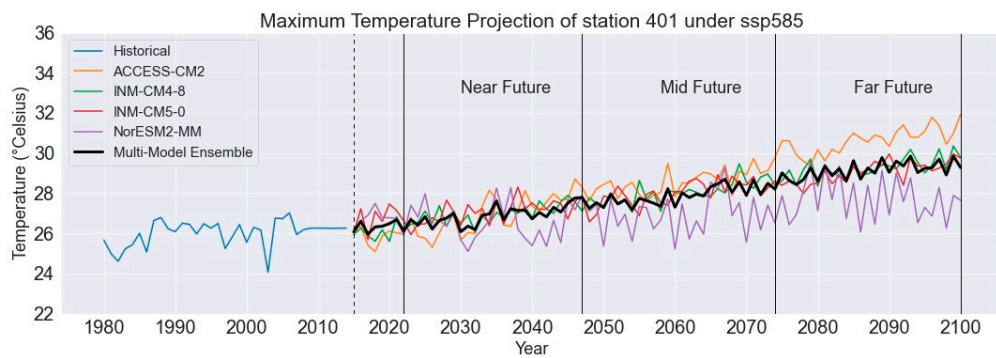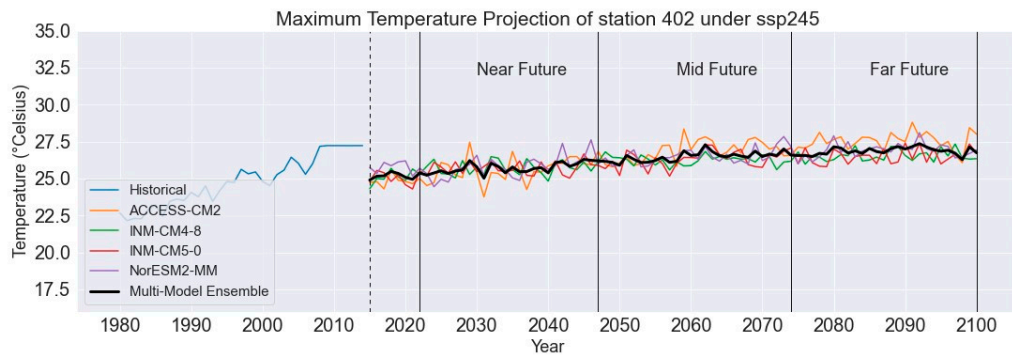

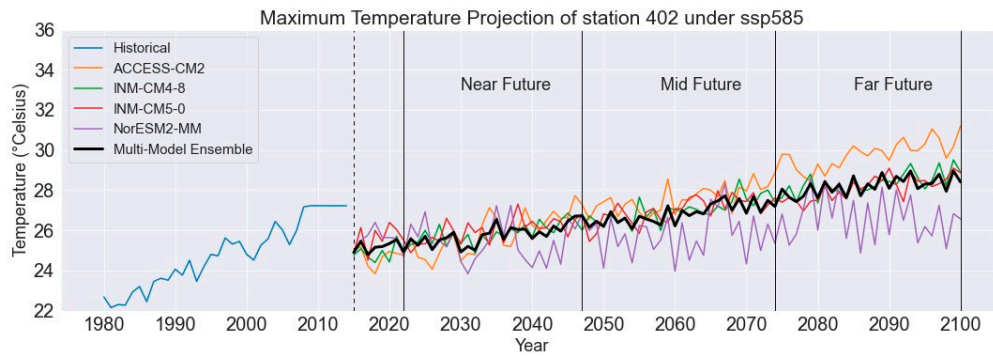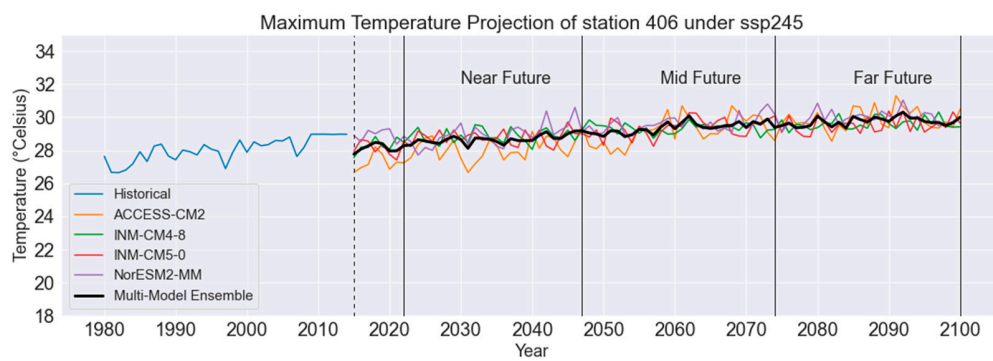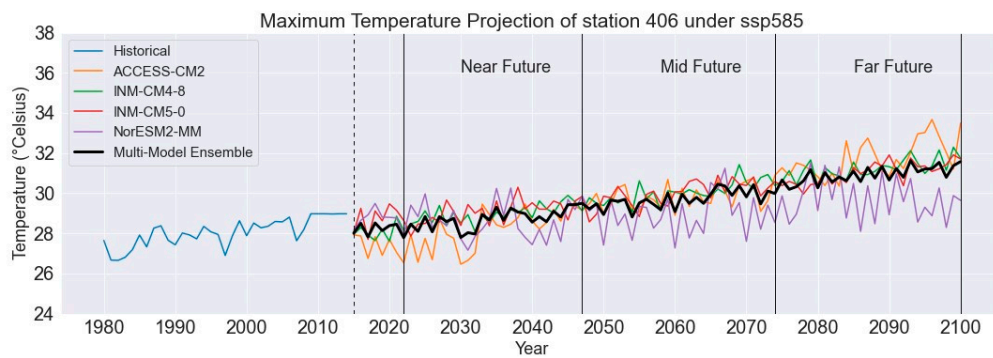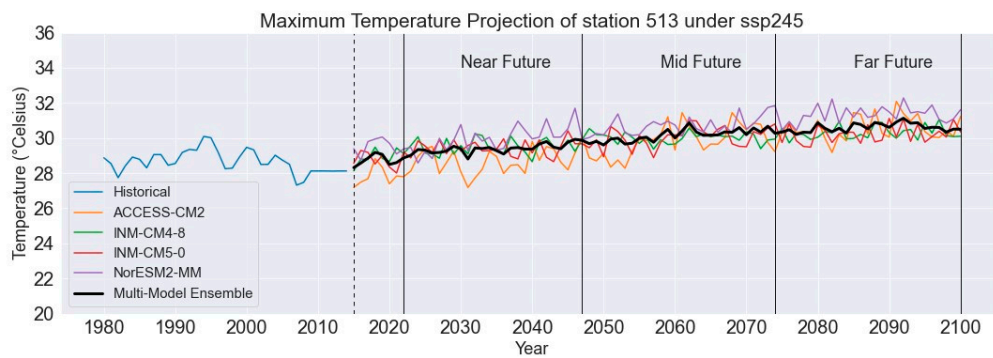

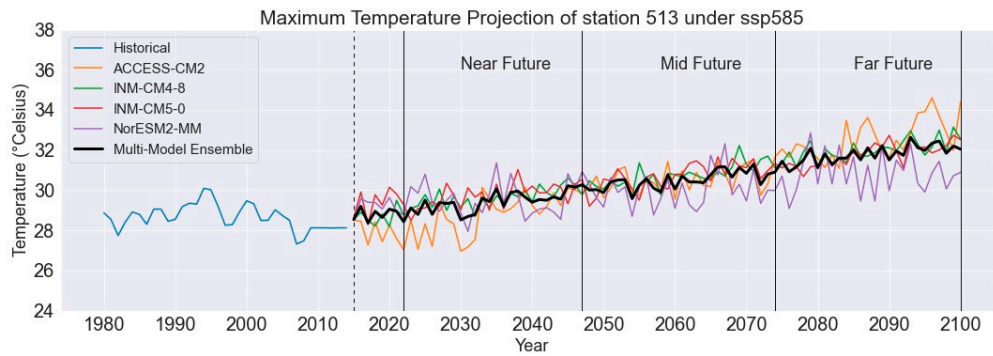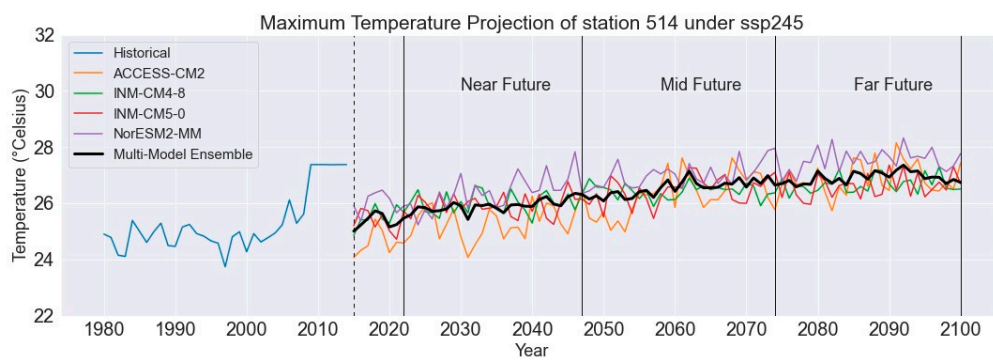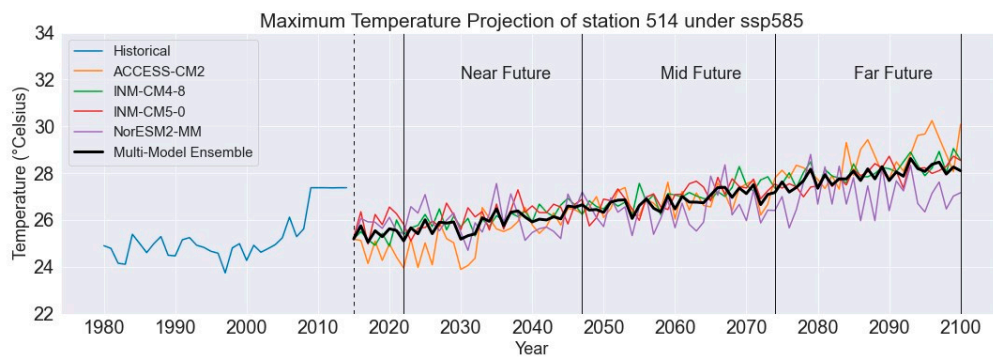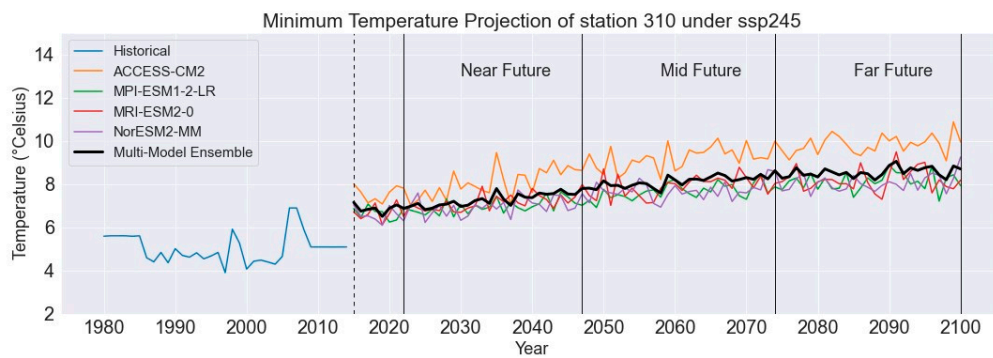



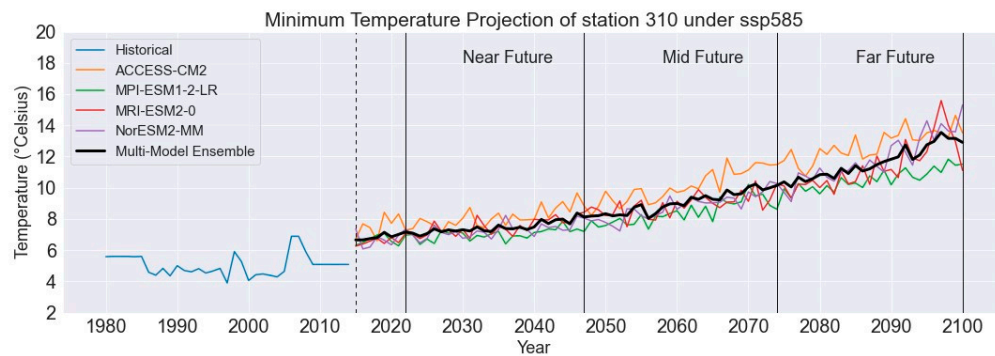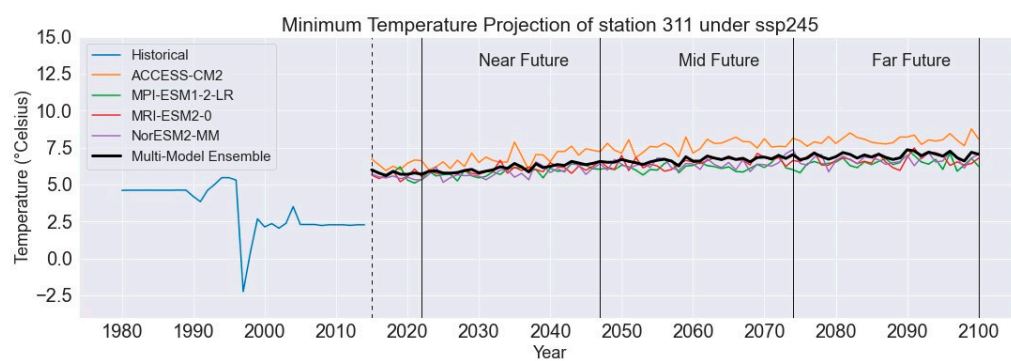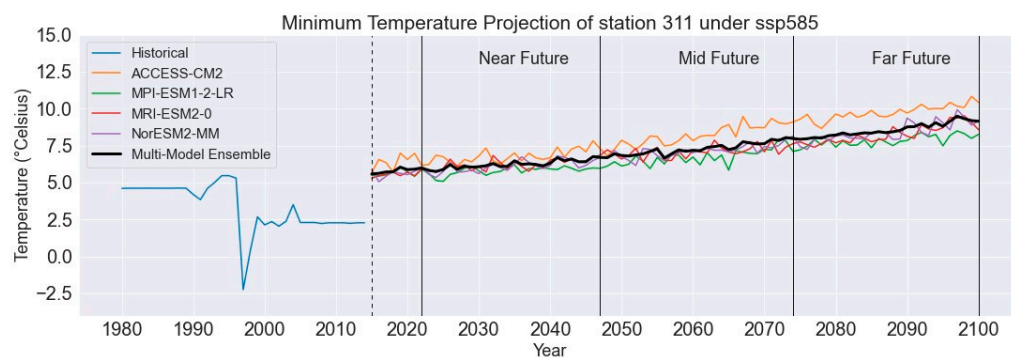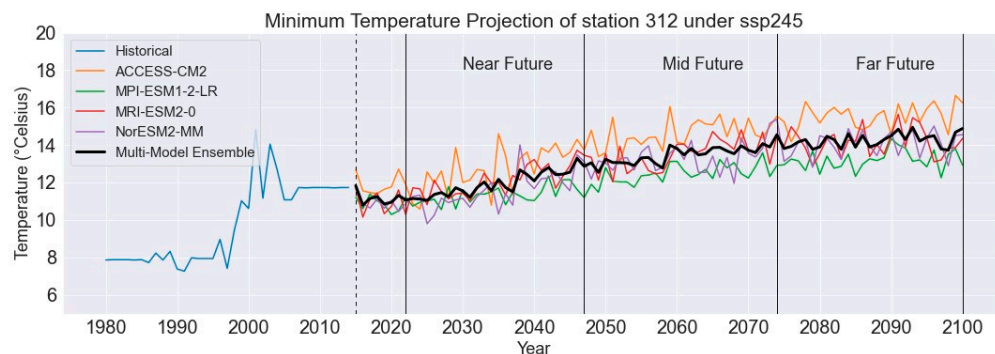

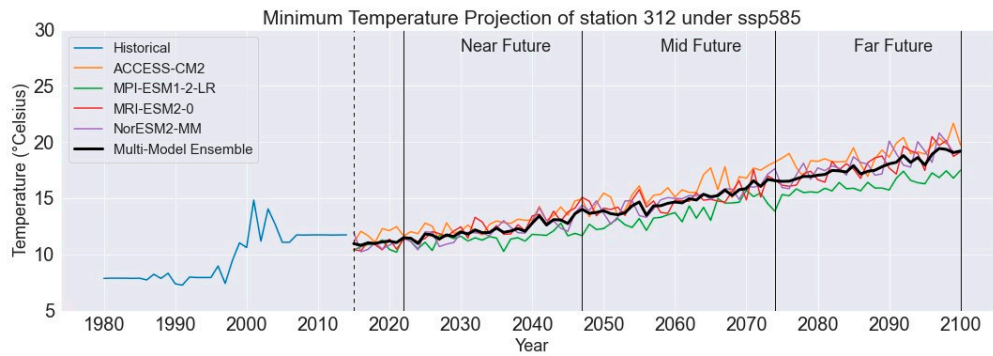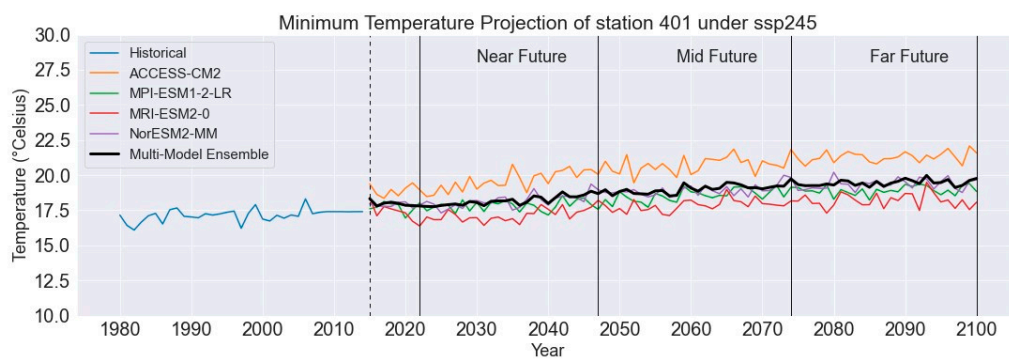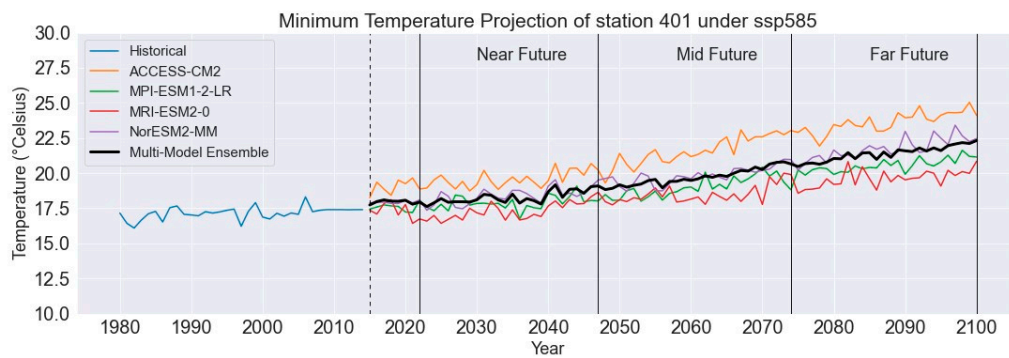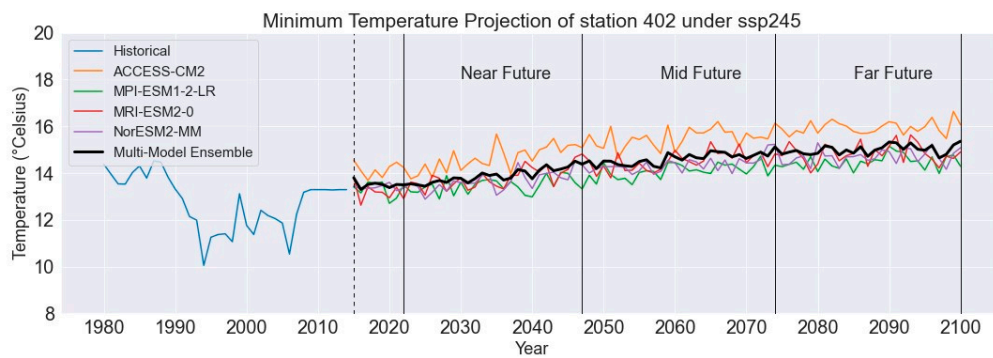

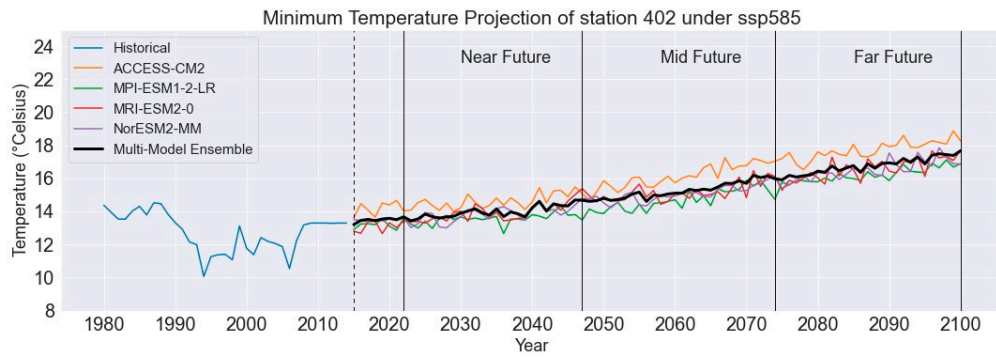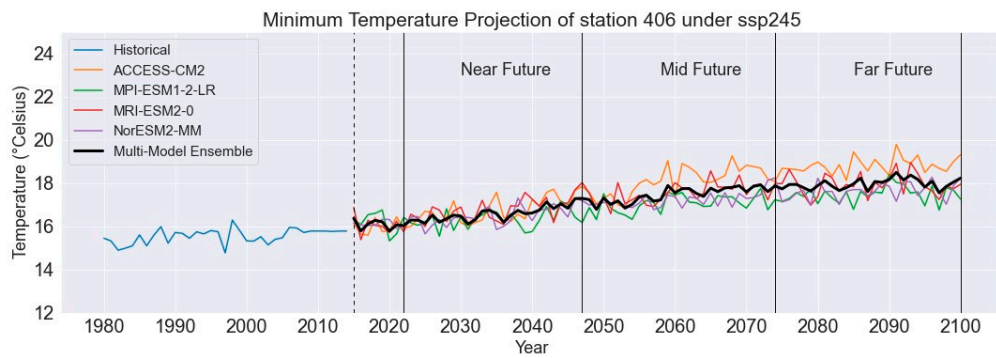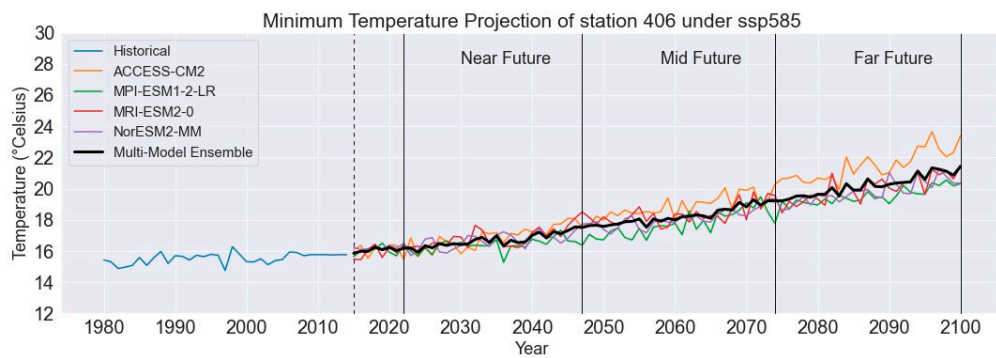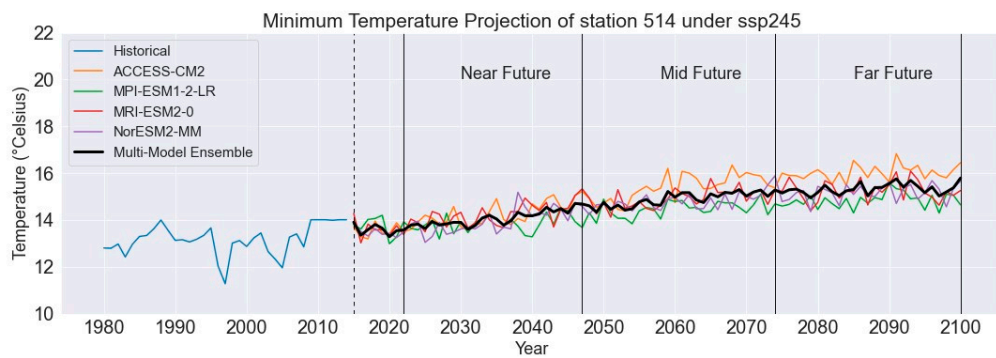

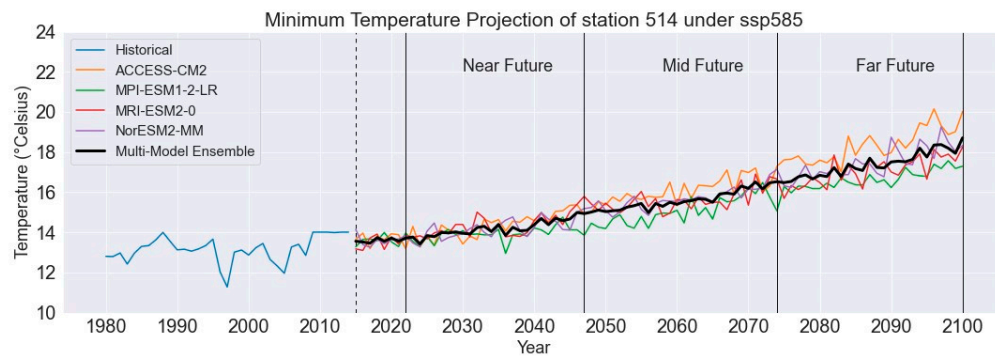

Supplement: s1 [file s1]
