# Supplementary material
Source: MDPI journal article supplement (https://www.mdpi.com/2071-1050/16/8/3262)

**Figure S3.** Monthly change in precipitation, maximum and minimum temperatures.

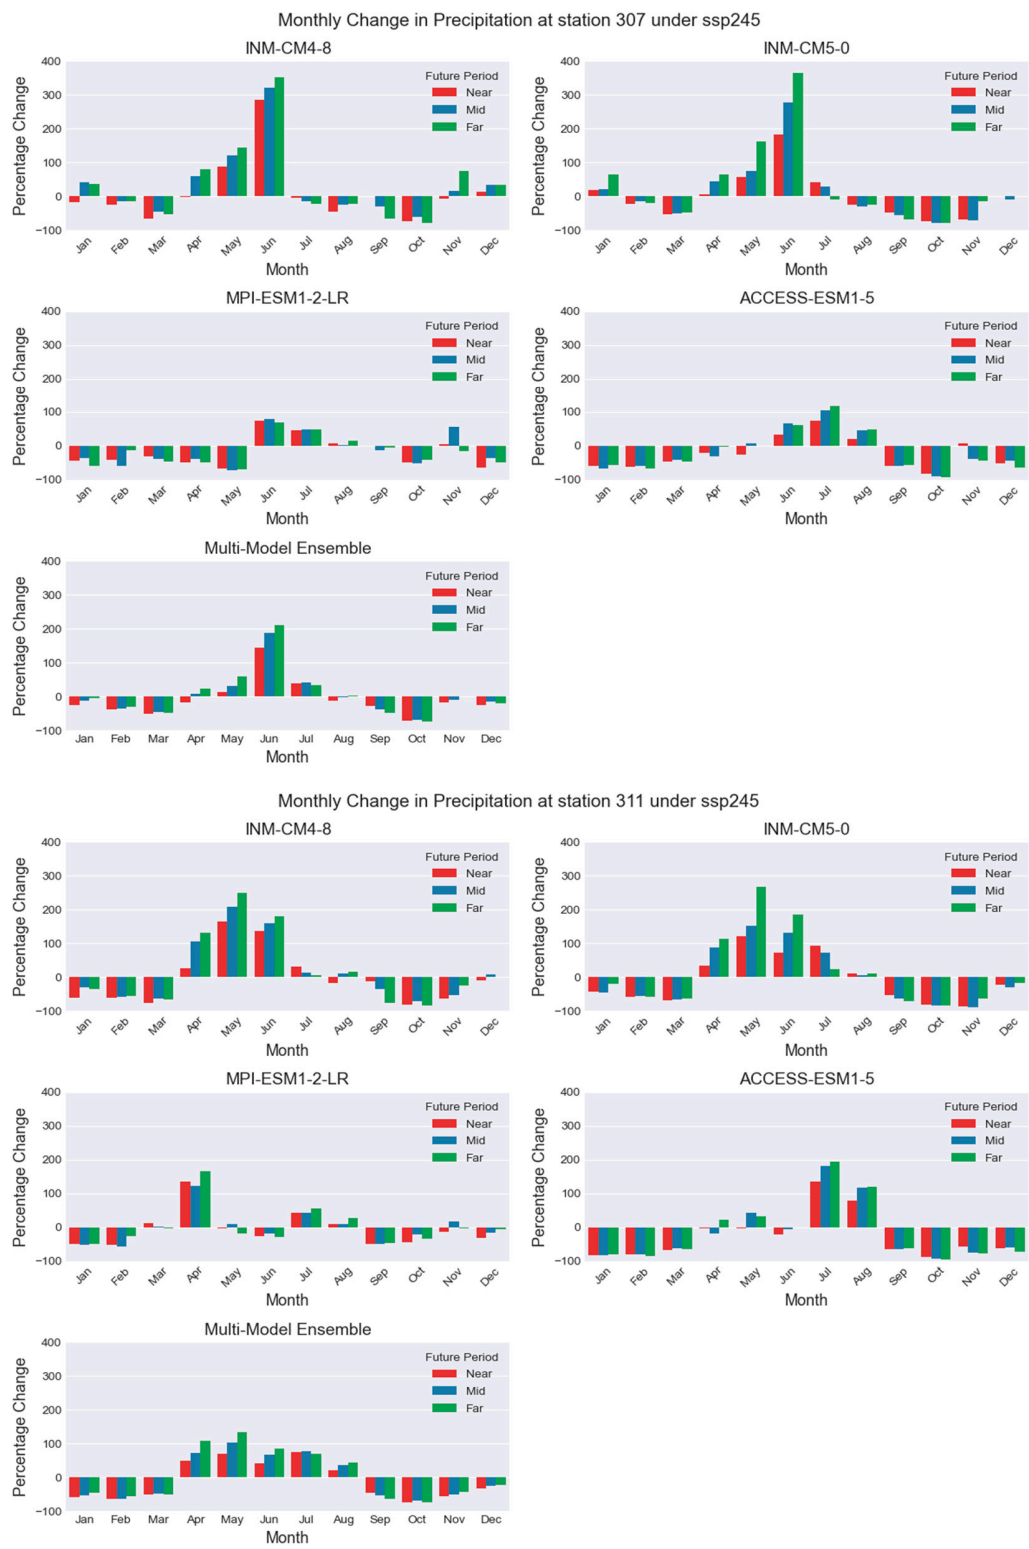

Monthly Change in Precipitation at station 312 under ssp245

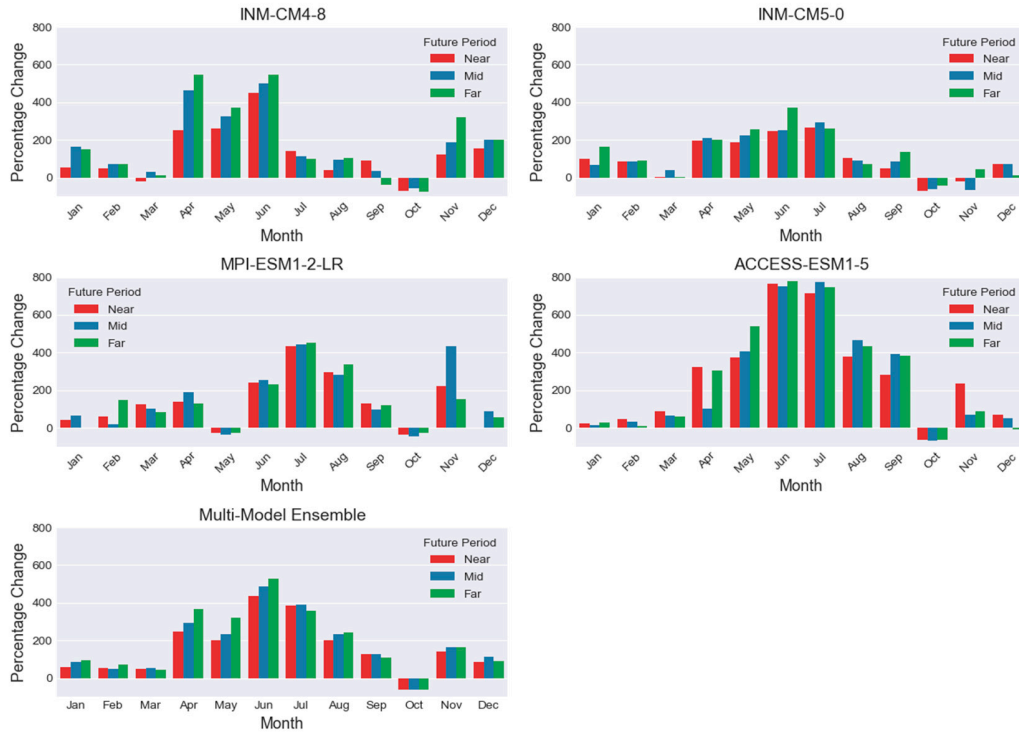

Monthly Change in Precipitation at station 401 under ssp245

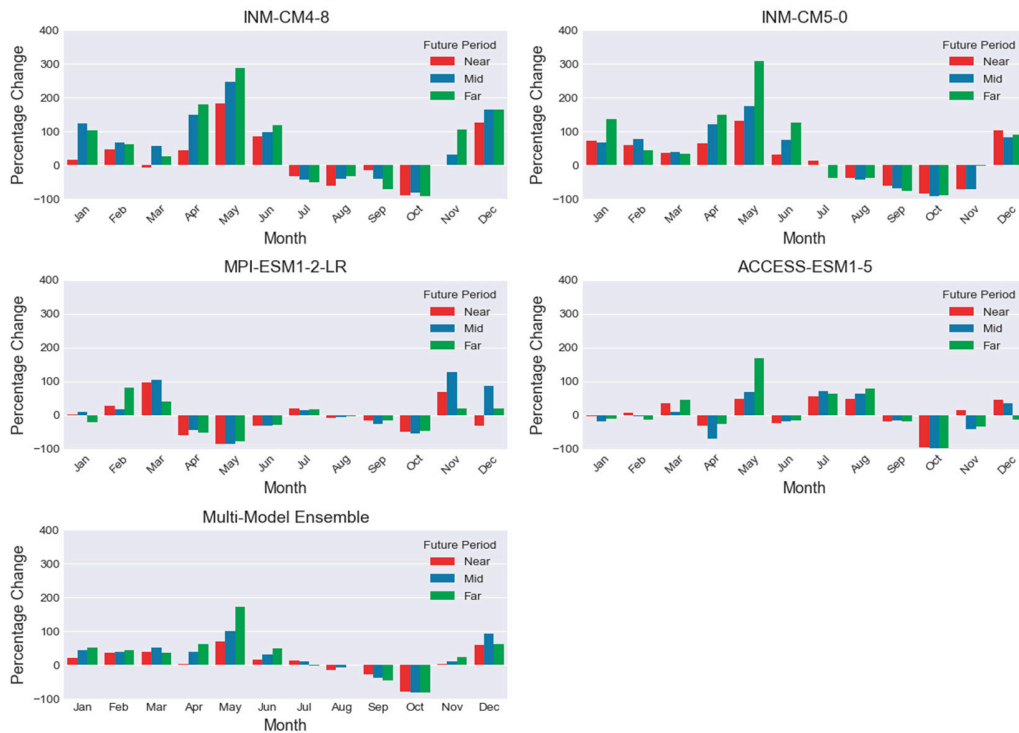

Monthly Change in Precipitation at station 402 under ssp245

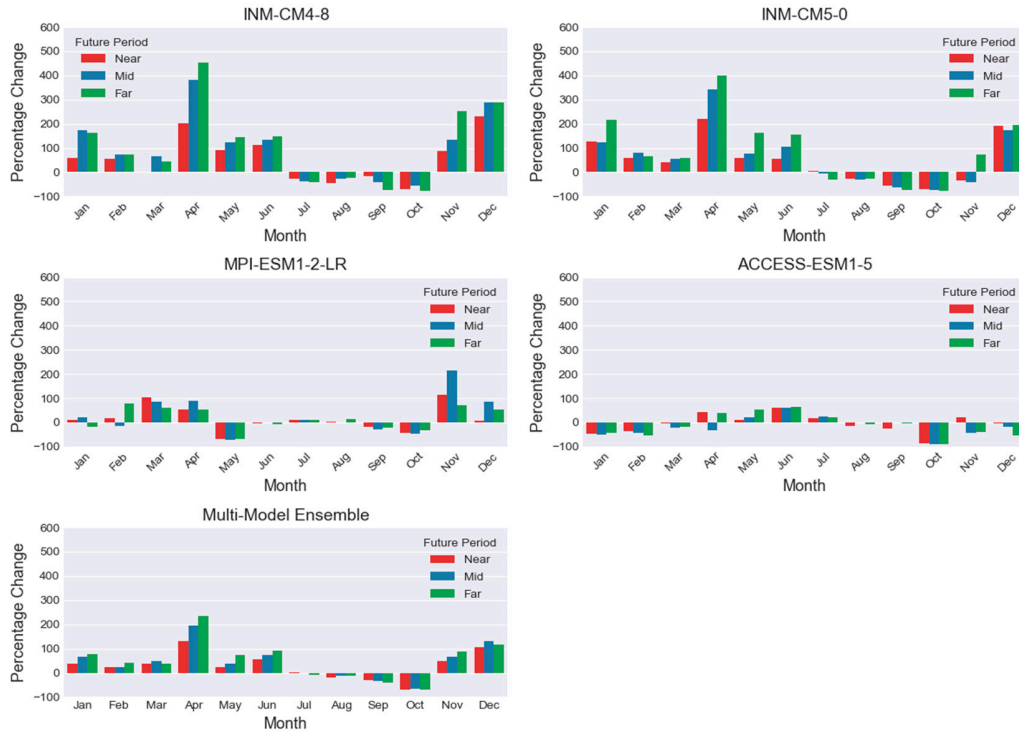

Monthly Change in Precipitation at station 406 under ssp245

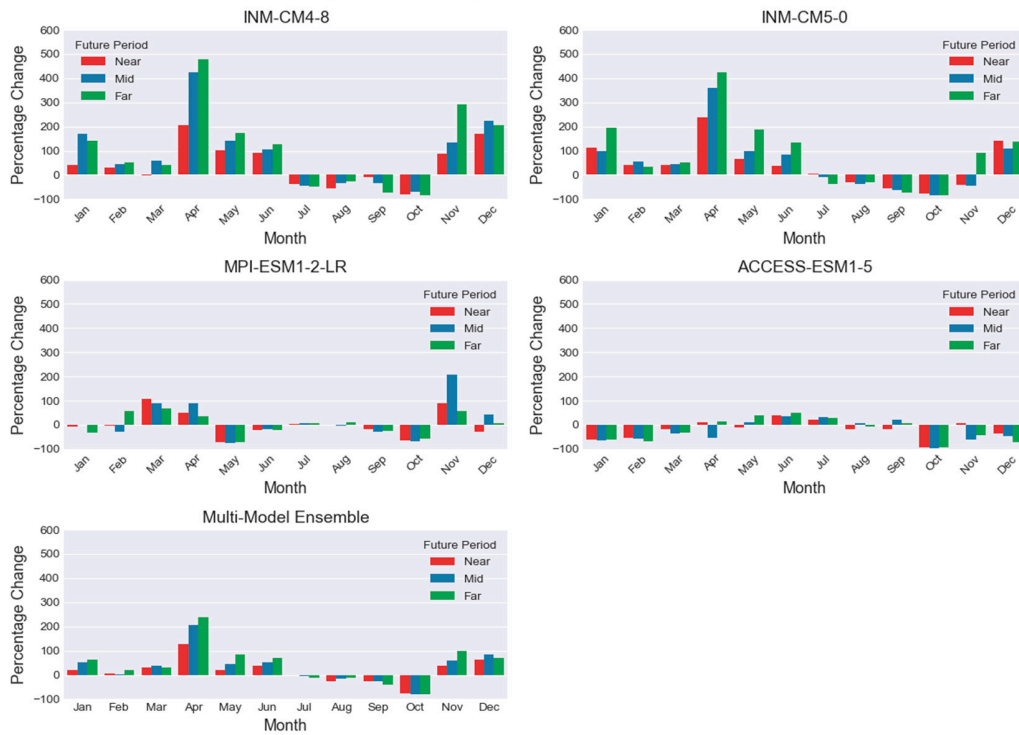

Monthly Change in Precipitation at station 513 under ssp245

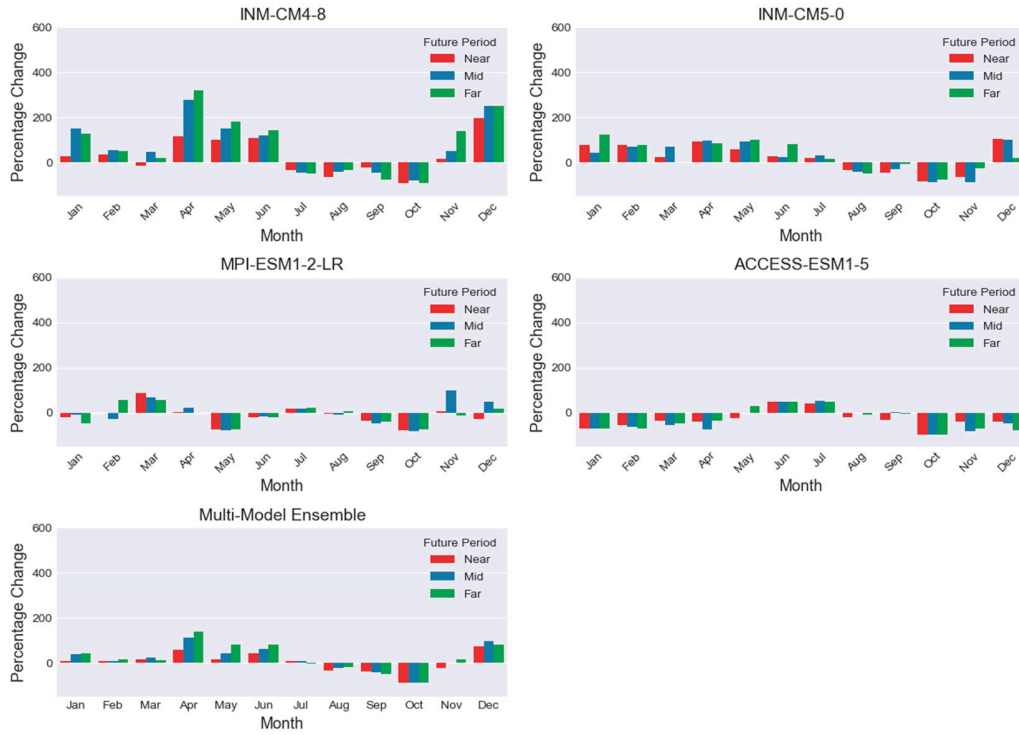



Monthly Change in Precipitation at station 307 under ssp585

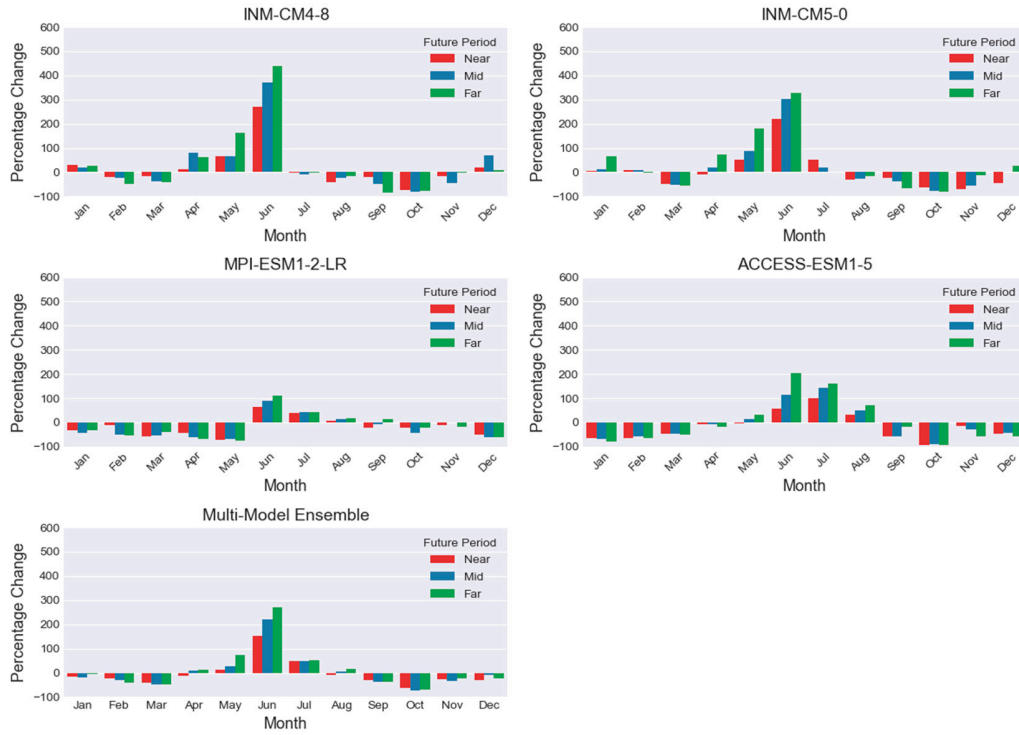

Monthly Change in Precipitation at station 310 under ssp585

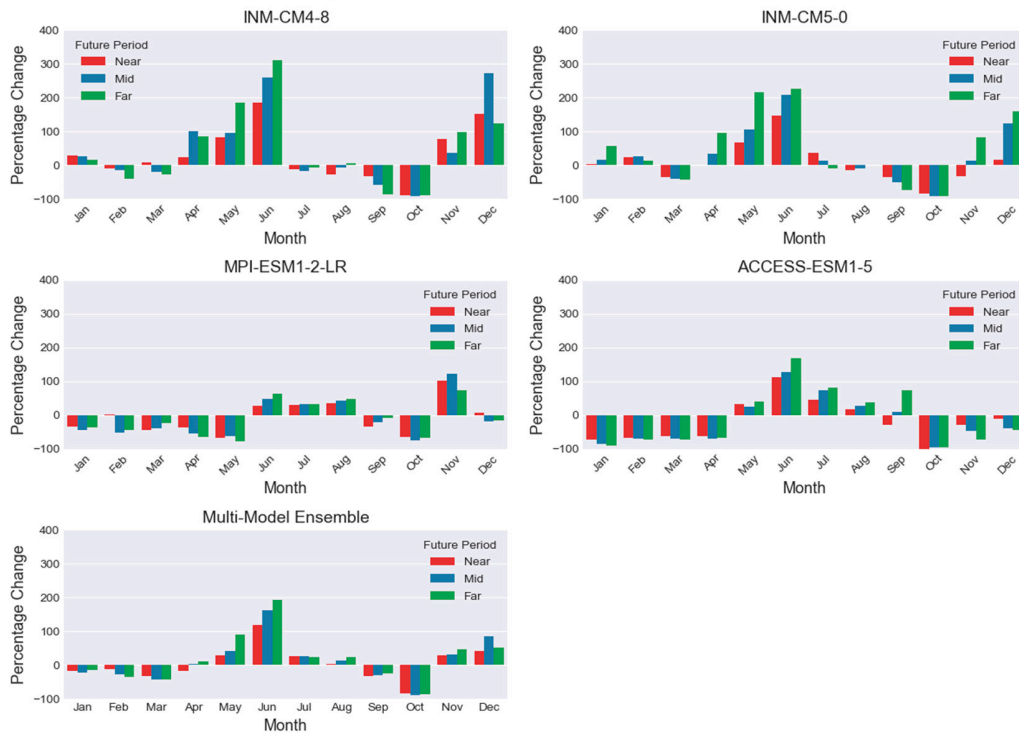

Monthly Change in Precipitation at station 311 under ssp585

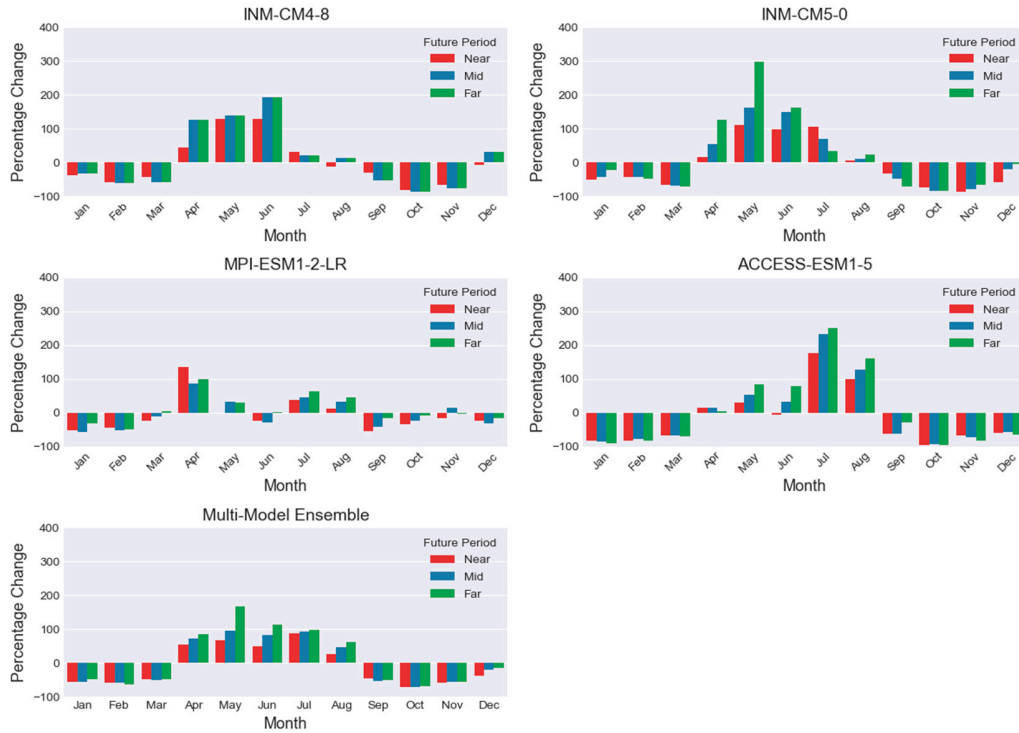

Monthly Change in Precipitation at station 312 under ssp585

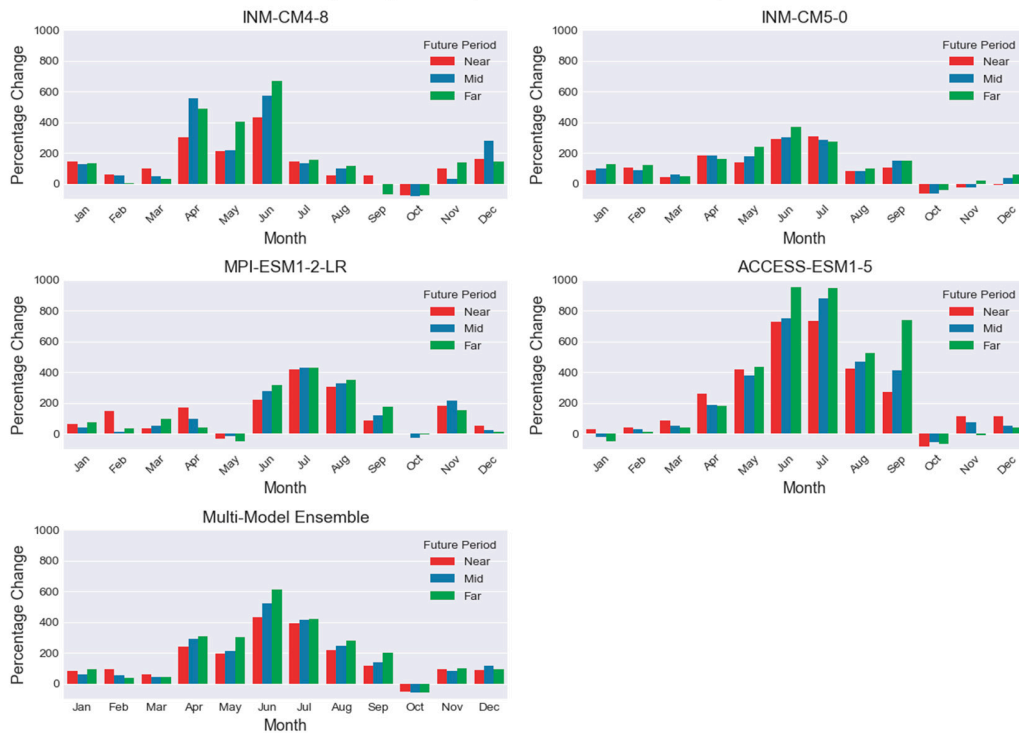

Monthly Change in Precipitation at station 401 under ssp585

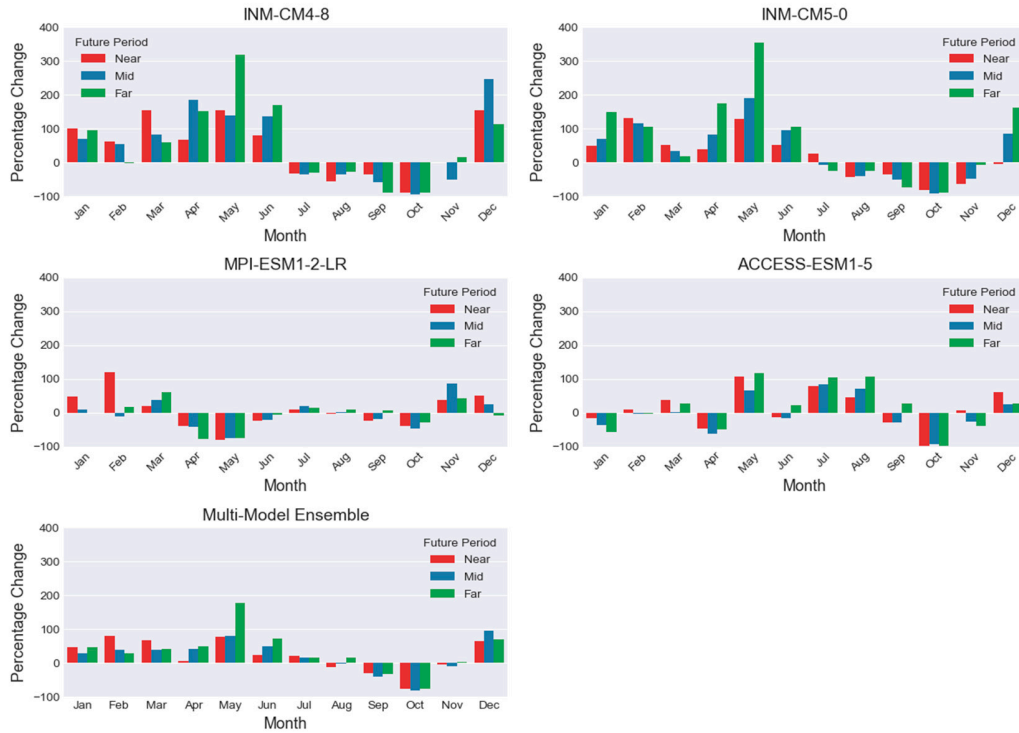

Monthly Change in Precipitation at station 402 under ssp585

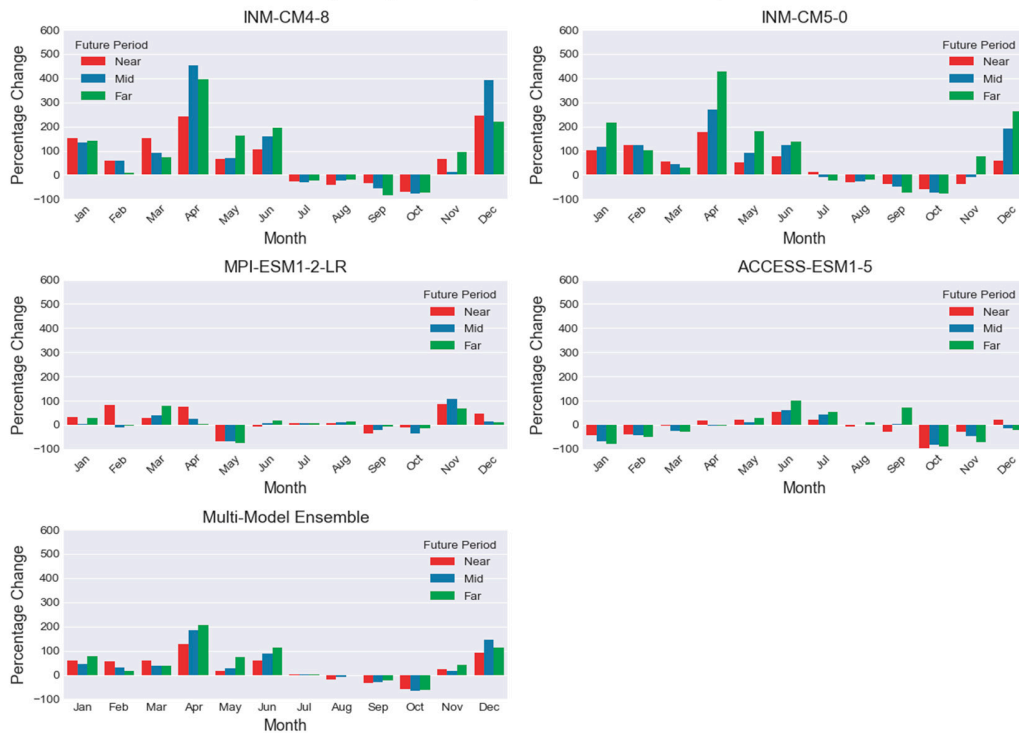

Monthly Change in Precipitation at station 406 under ssp585

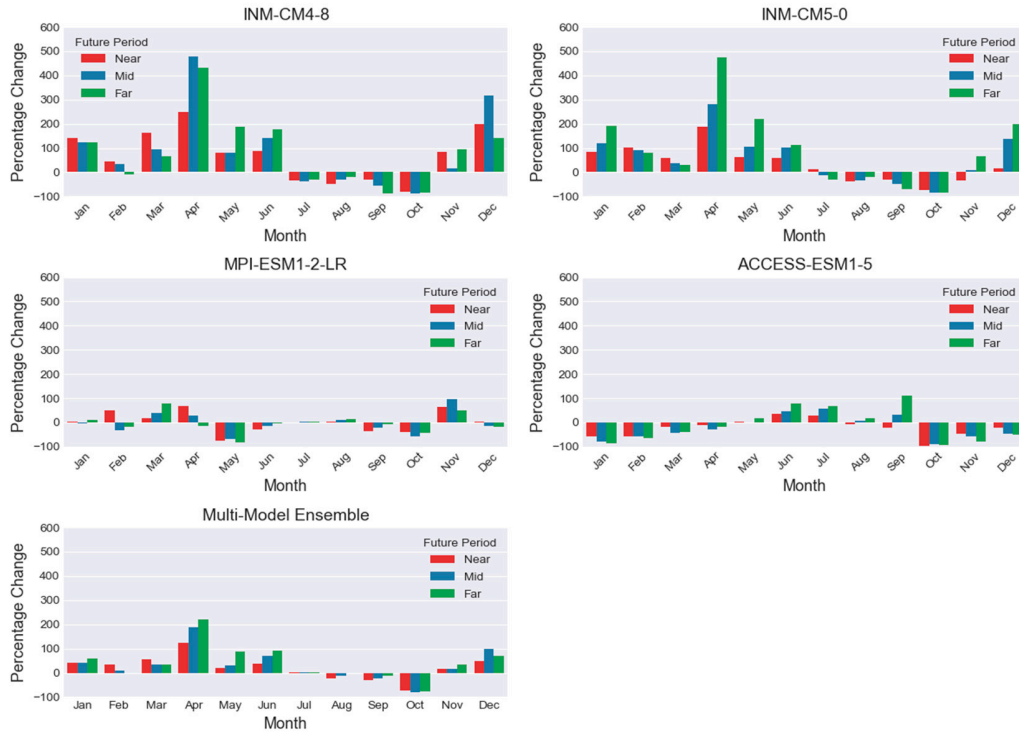

Monthly Change in Precipitation at station 513 under ssp585

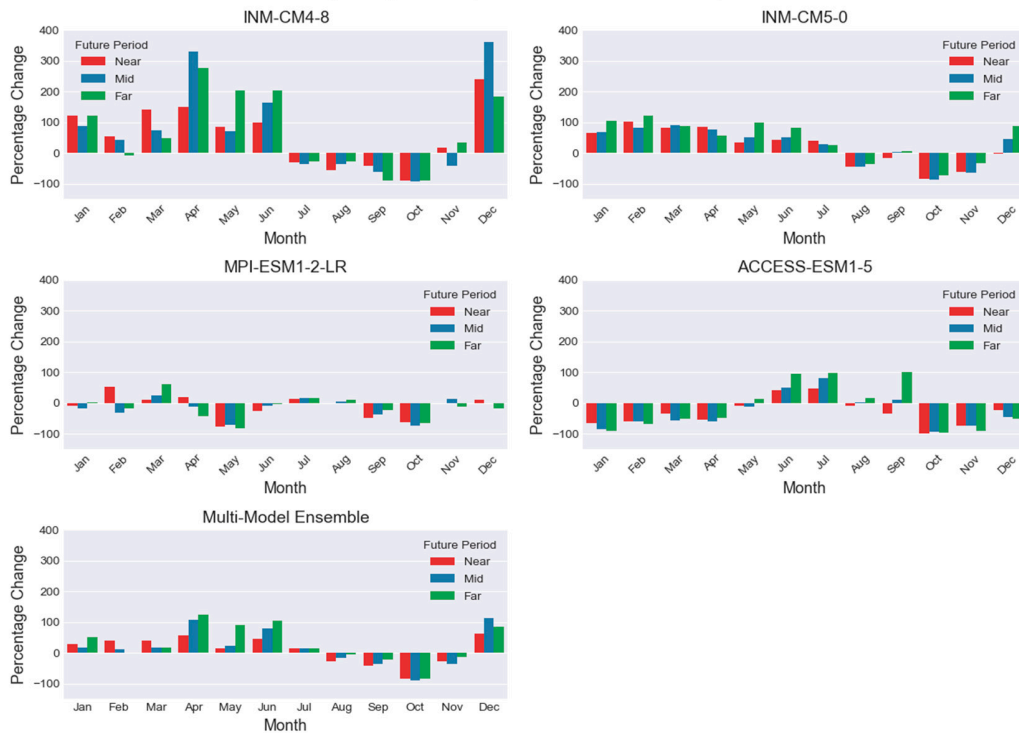

Monthly Change in Maximum Temperature at station 310 under ssp245

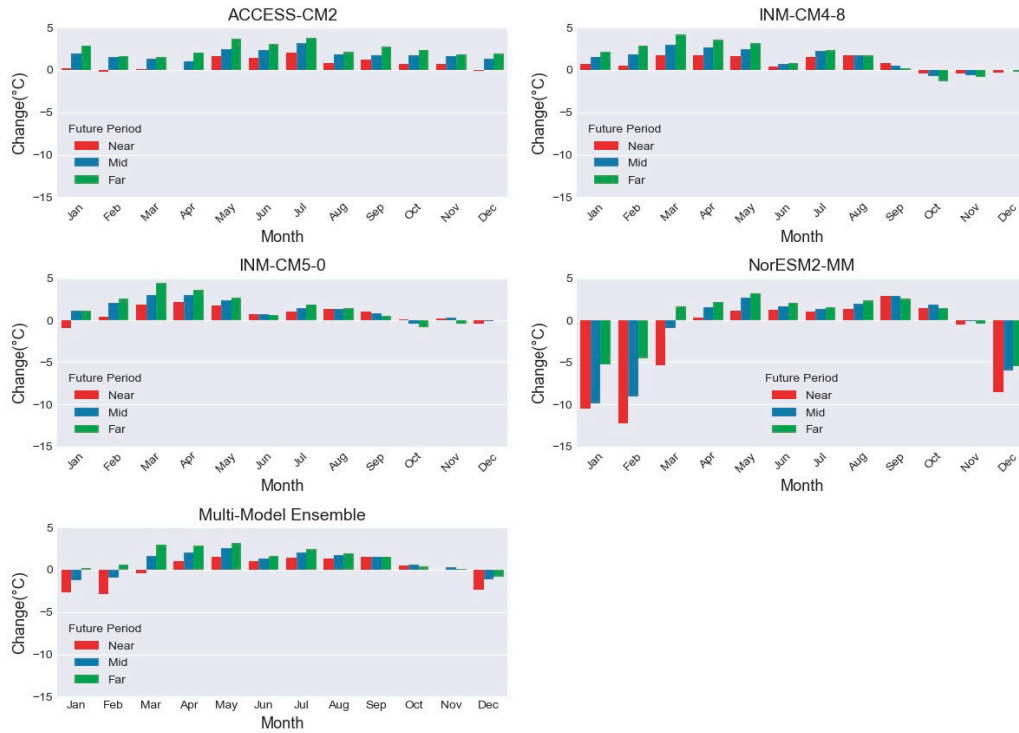

Monthly Change in Maximum Temperature at station 311 under ssp245

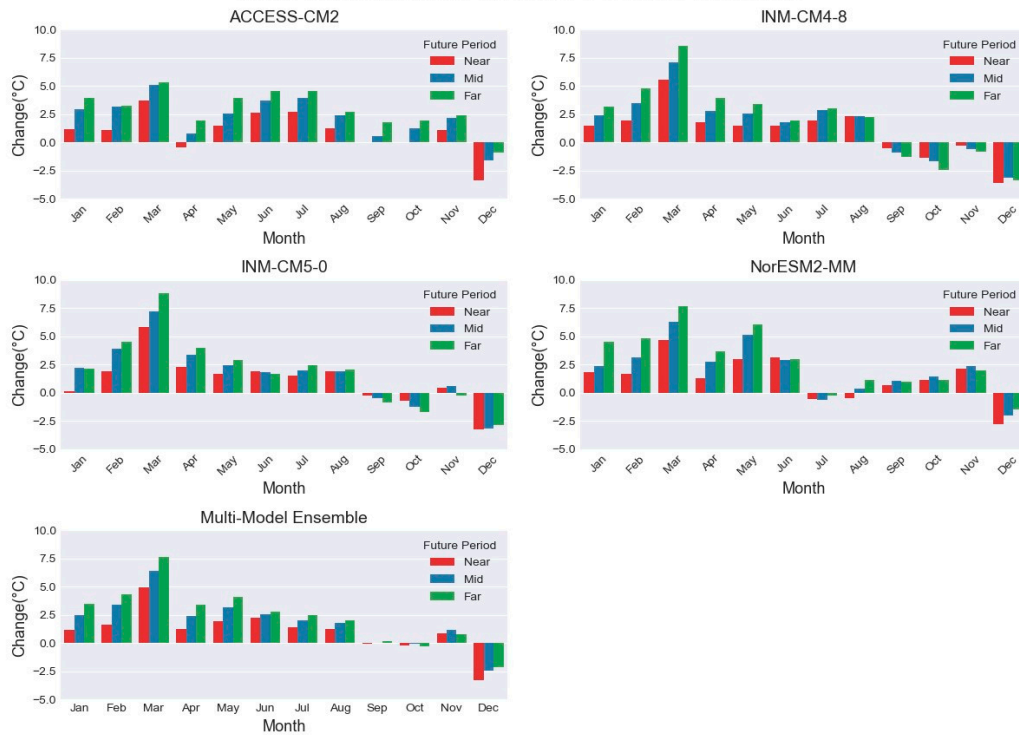

Monthly Change in Maximum Temperature at station 312 under ssp245

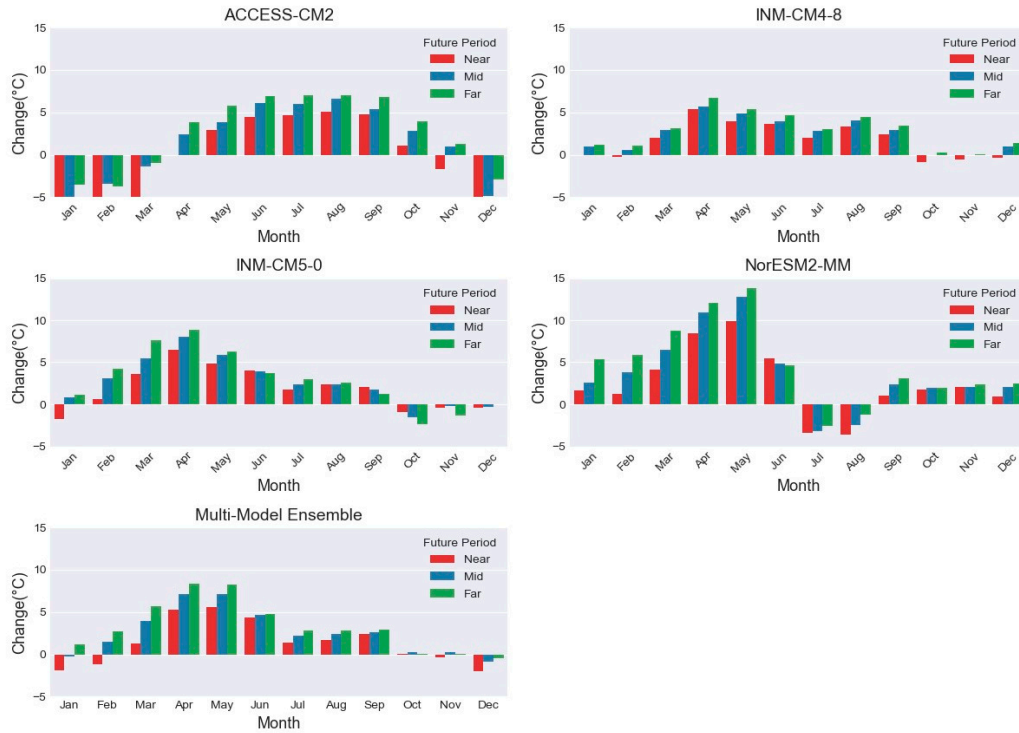

Monthly Change in Maximum Temperature at station 401 under ssp245

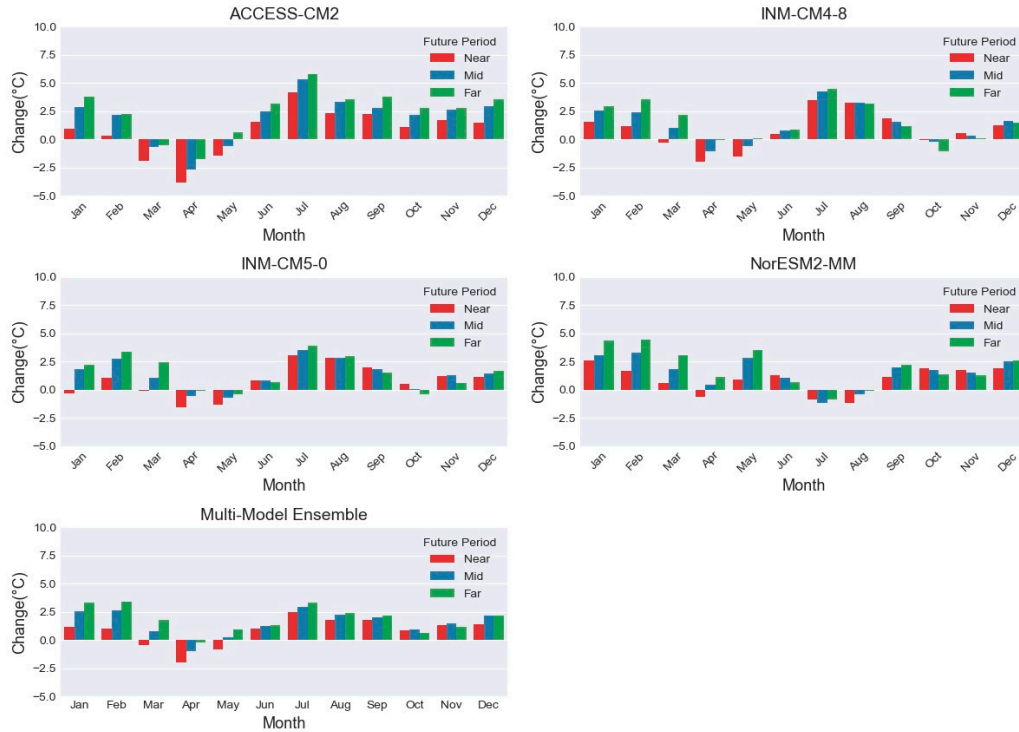

Monthly Change in Maximum Temperature at station 402 under ssp245

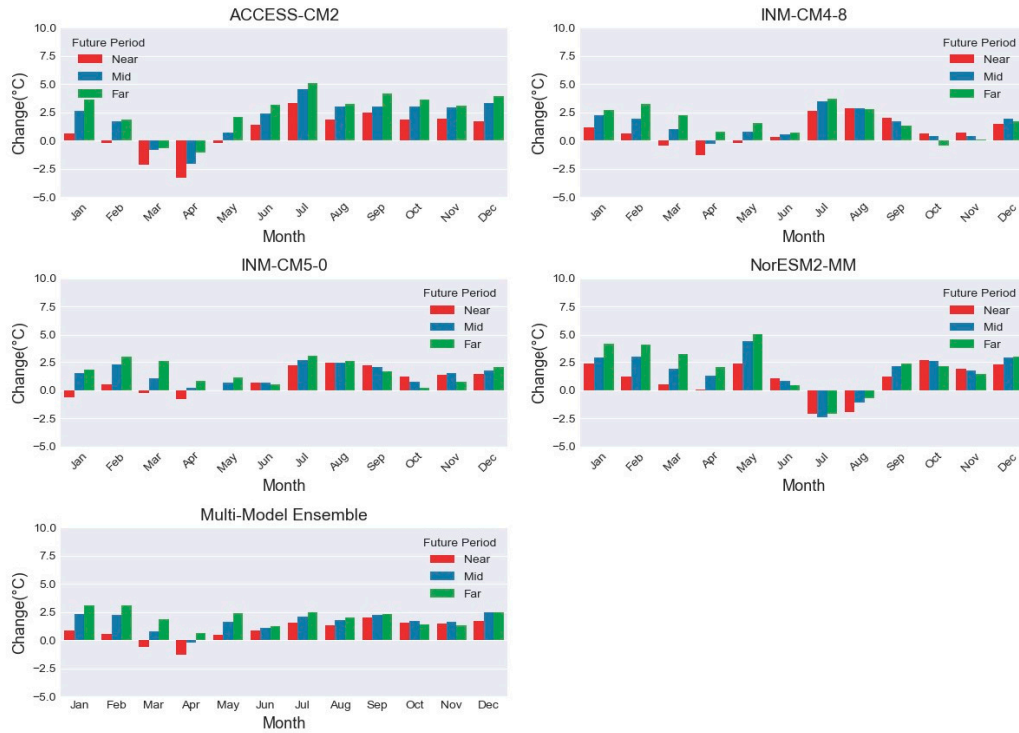

Monthly Change in Maximum Temperature at station 406 under ssp245

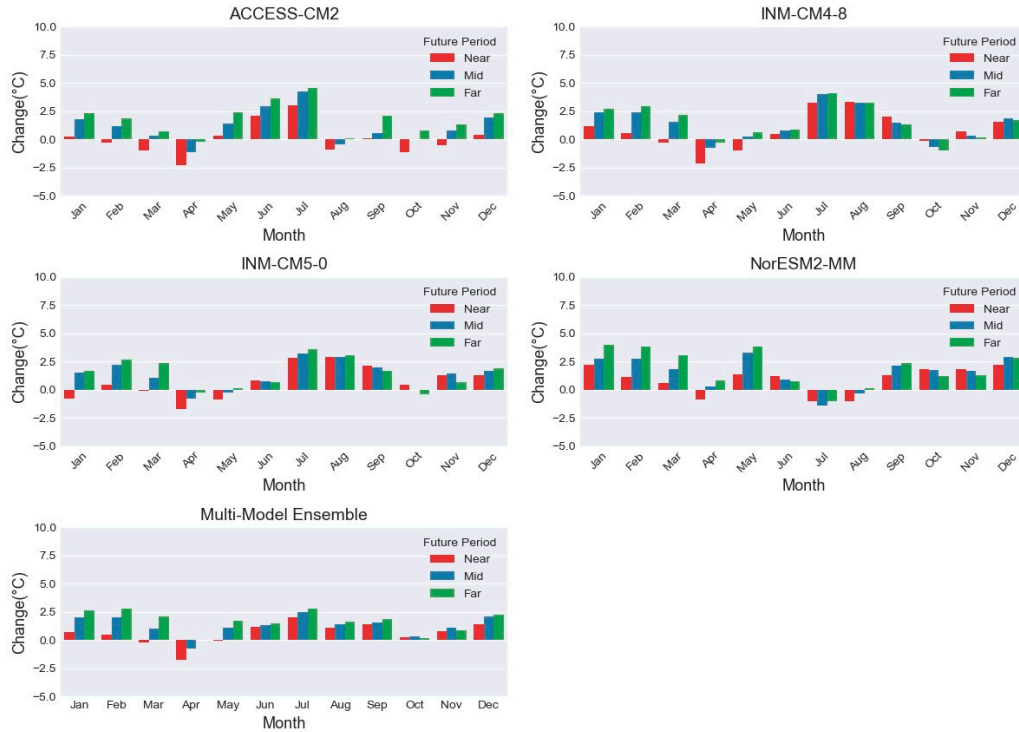



Monthly Change in Maximum Temperature at station 513 under ssp245

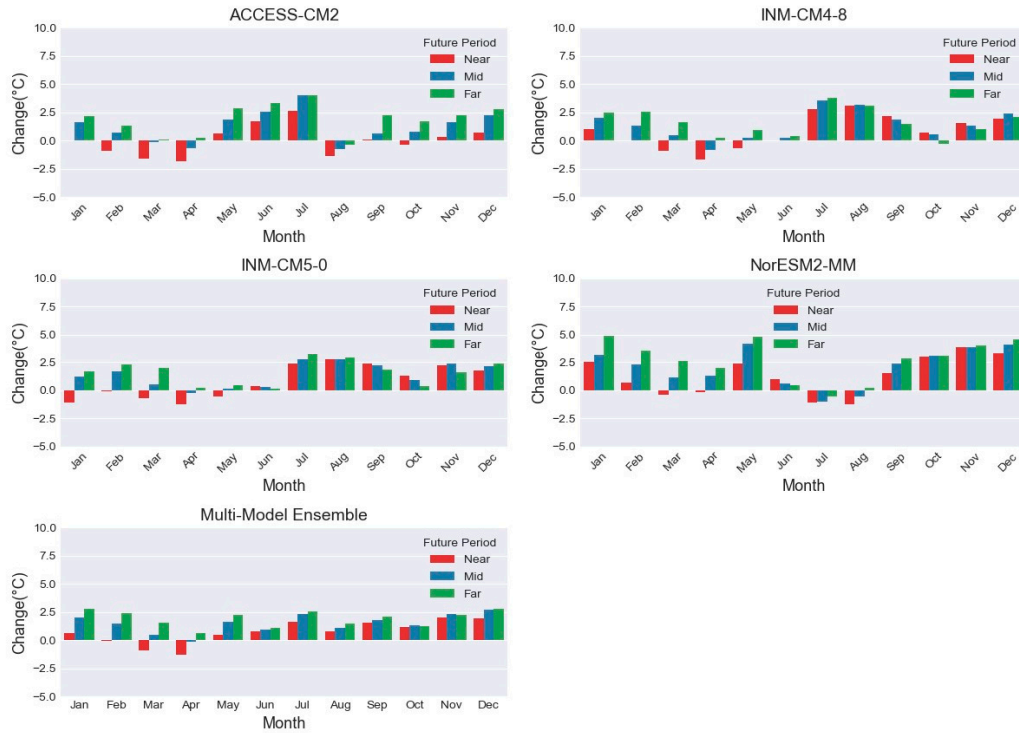

Monthly Change in Maximum Temperature at station 514 under ssp245

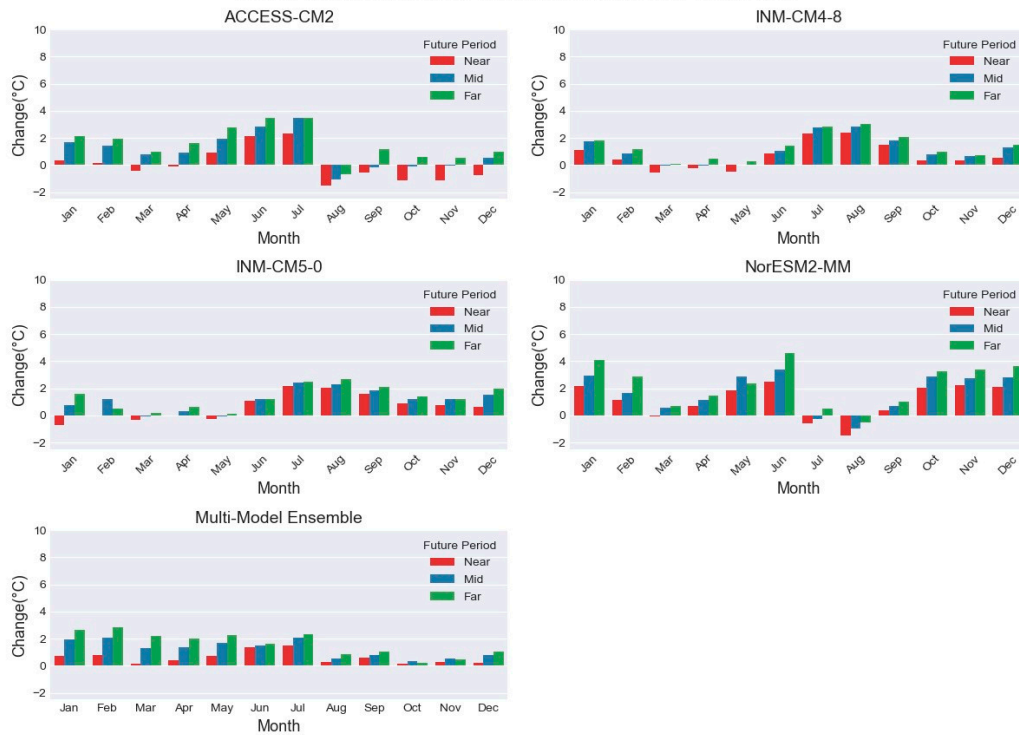



Monthly Change in Maximum Temperature at station 310 under ssp585

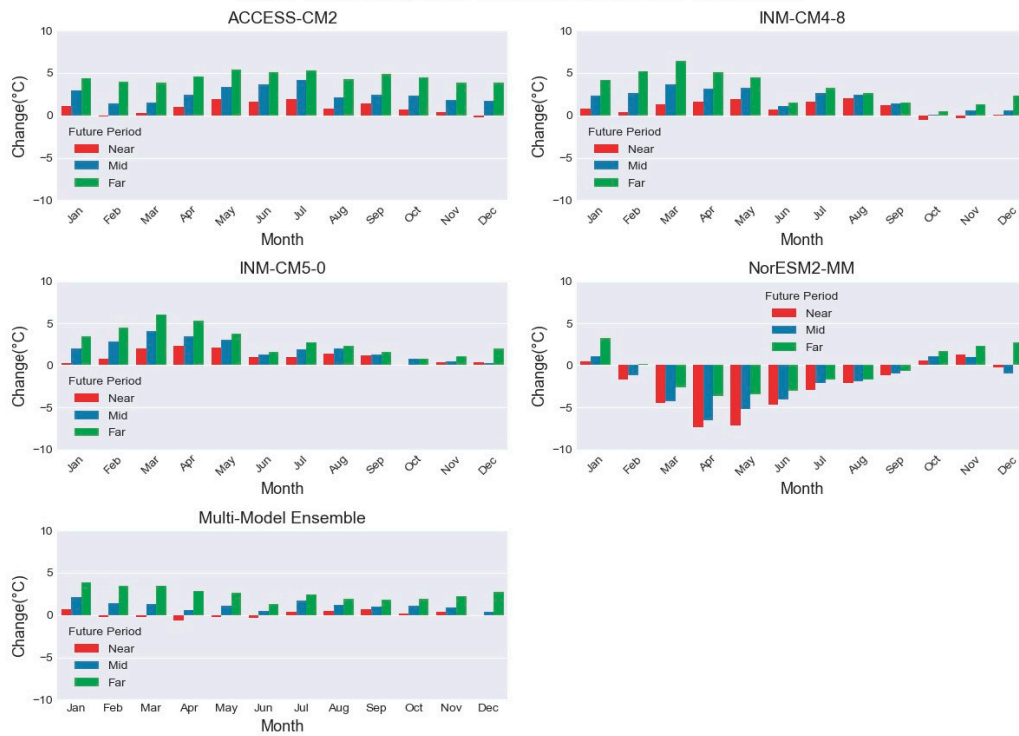

Monthly Change in Maximum Temperature at station 311 under ssp585

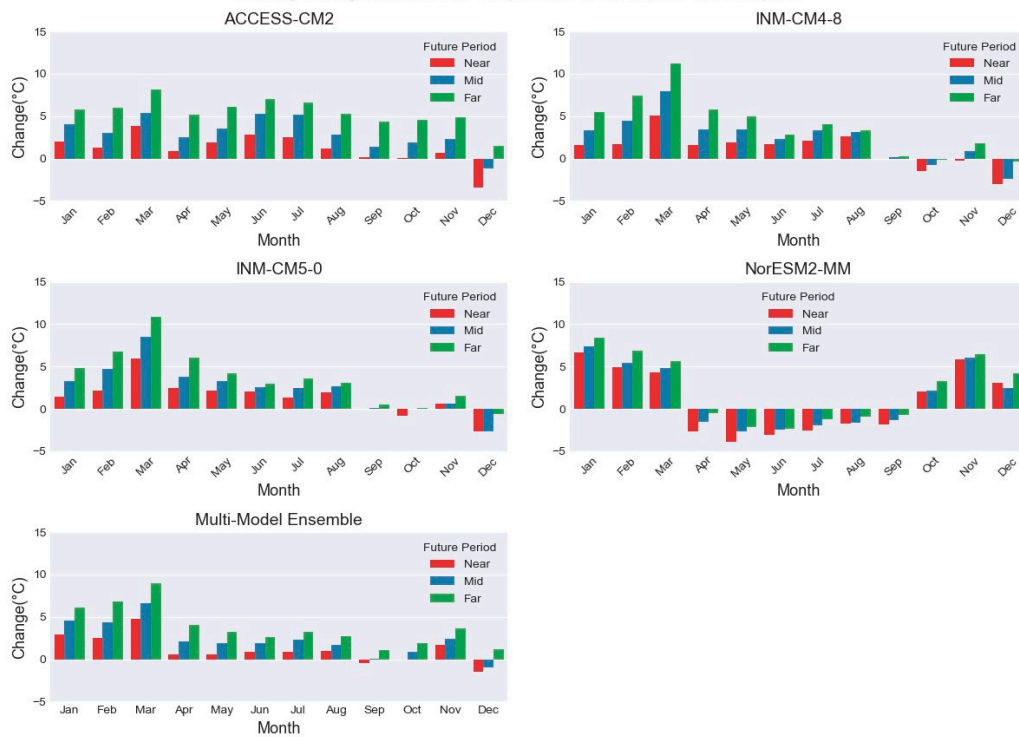

Monthly Change in Maximum Temperature at station 312 under ssp585

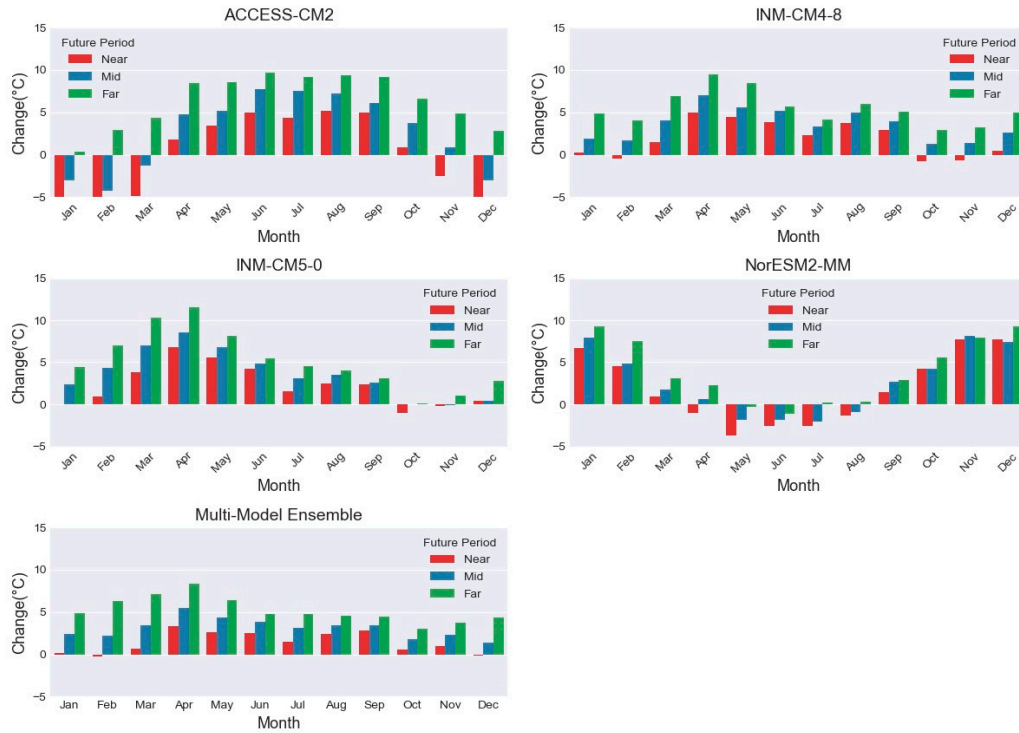

Monthly Change in Maximum Temperature at station 401 under ssp585

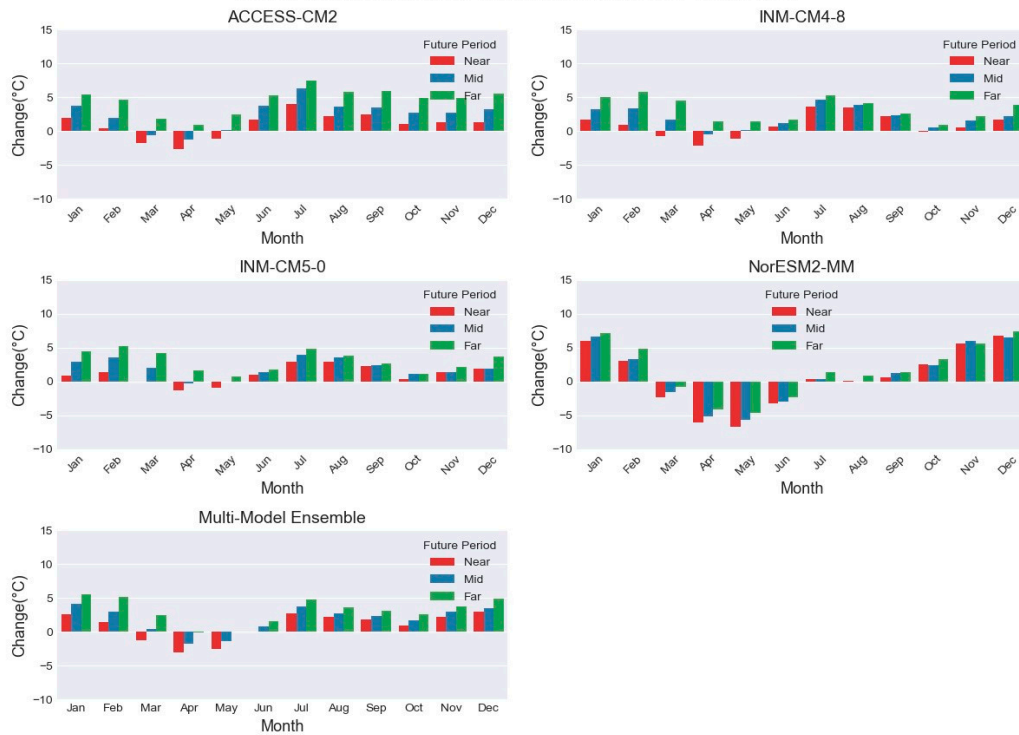

Monthly Change in Maximum Temperature at station 402 under ssp585

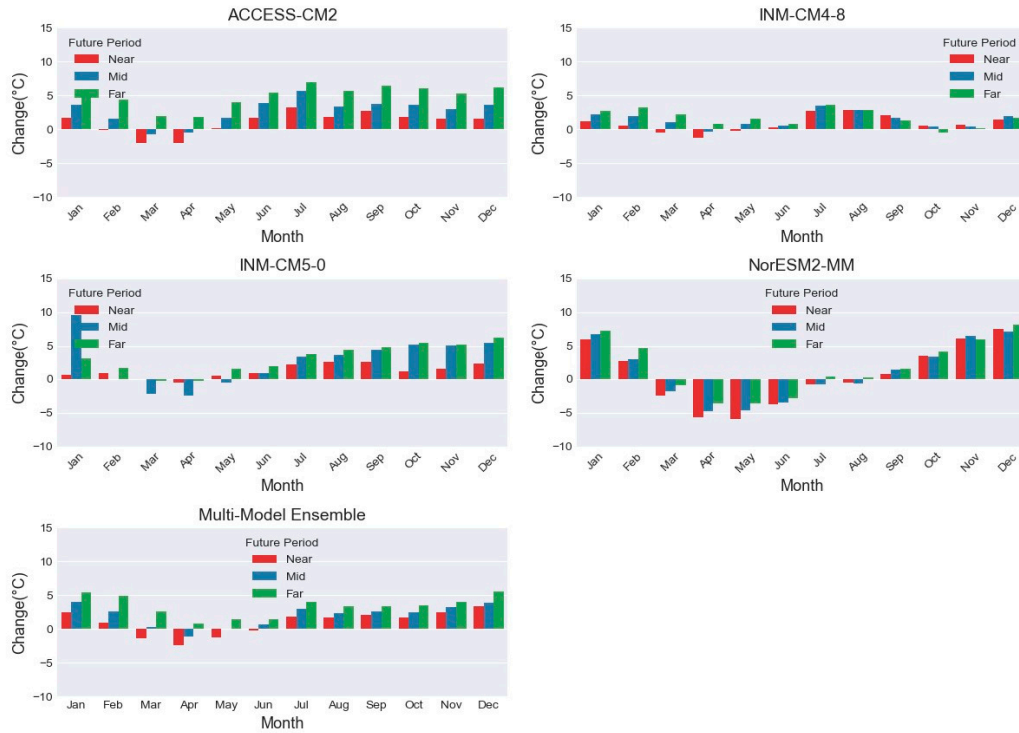

Monthly Change in Maximum Temperature at station 406 under ssp585

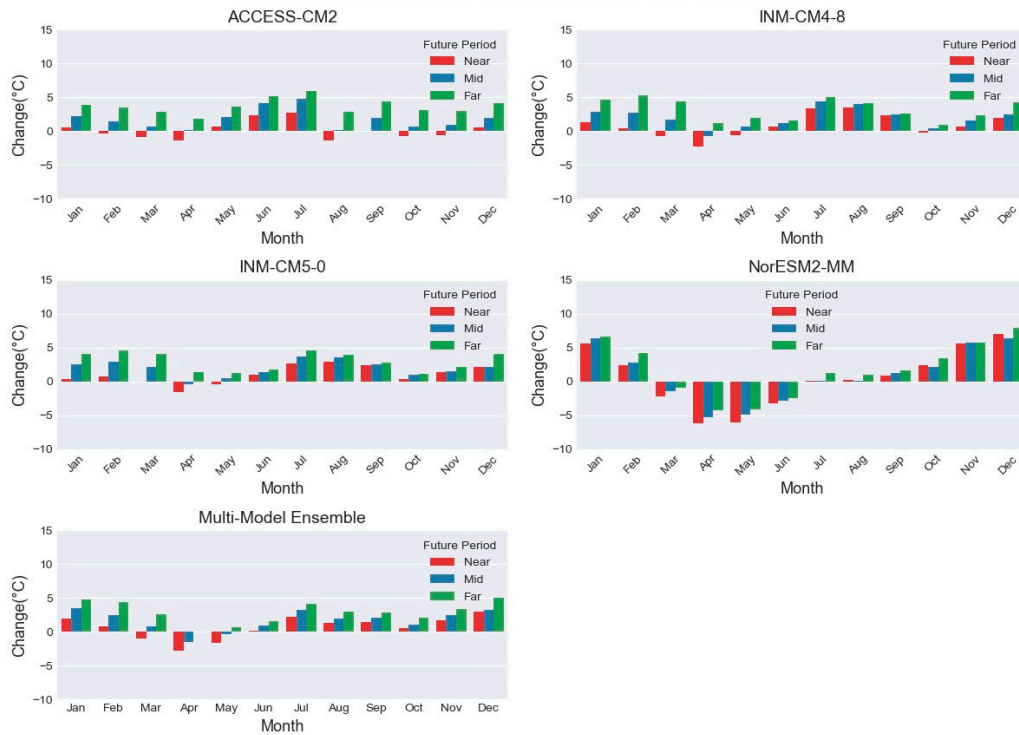

Monthly Change in Maximum Temperature at station 513 under ssp585

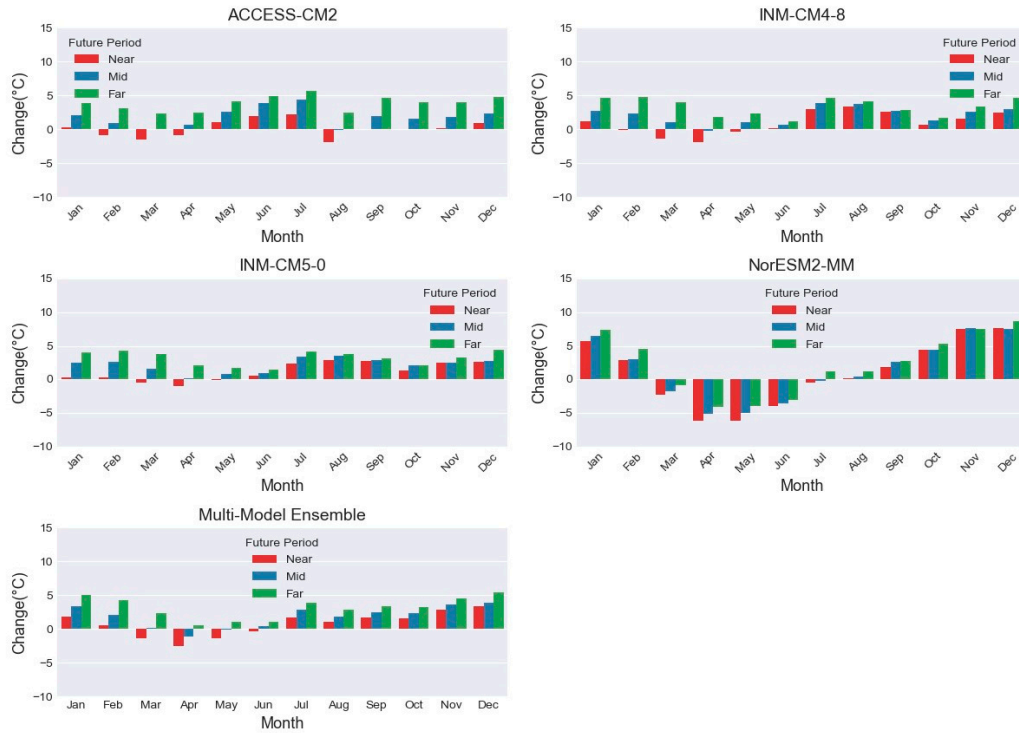

Monthly Change in Maximum Temperature at station 514 under ssp585

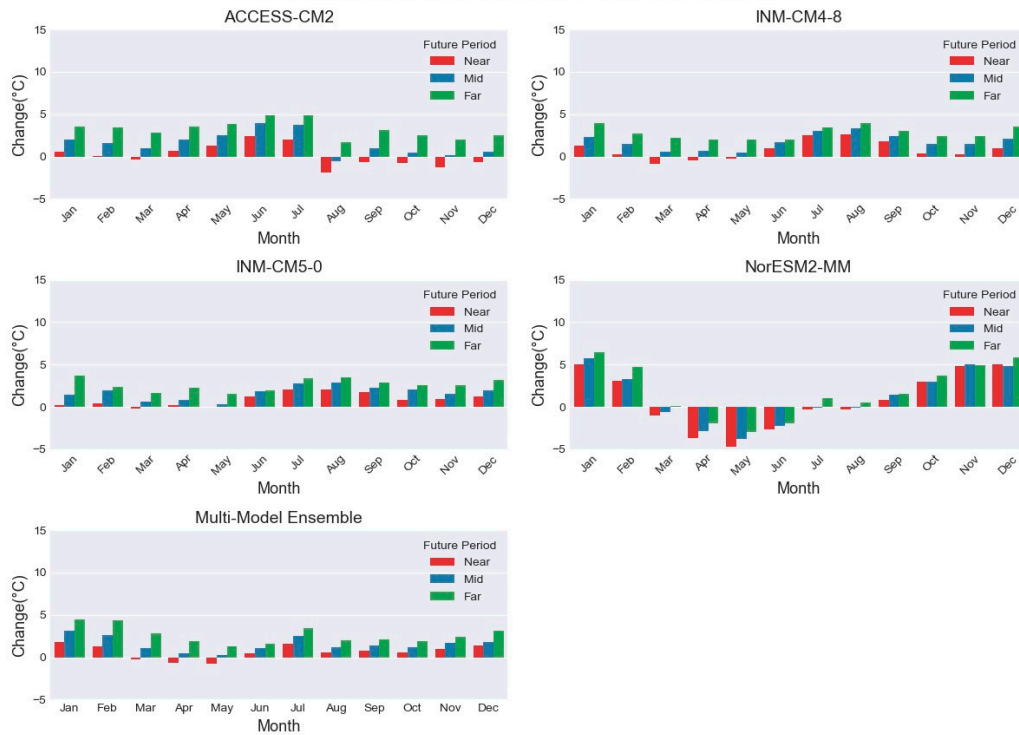

Monthly Change in Minimum Temperature at station 310 under ssp245

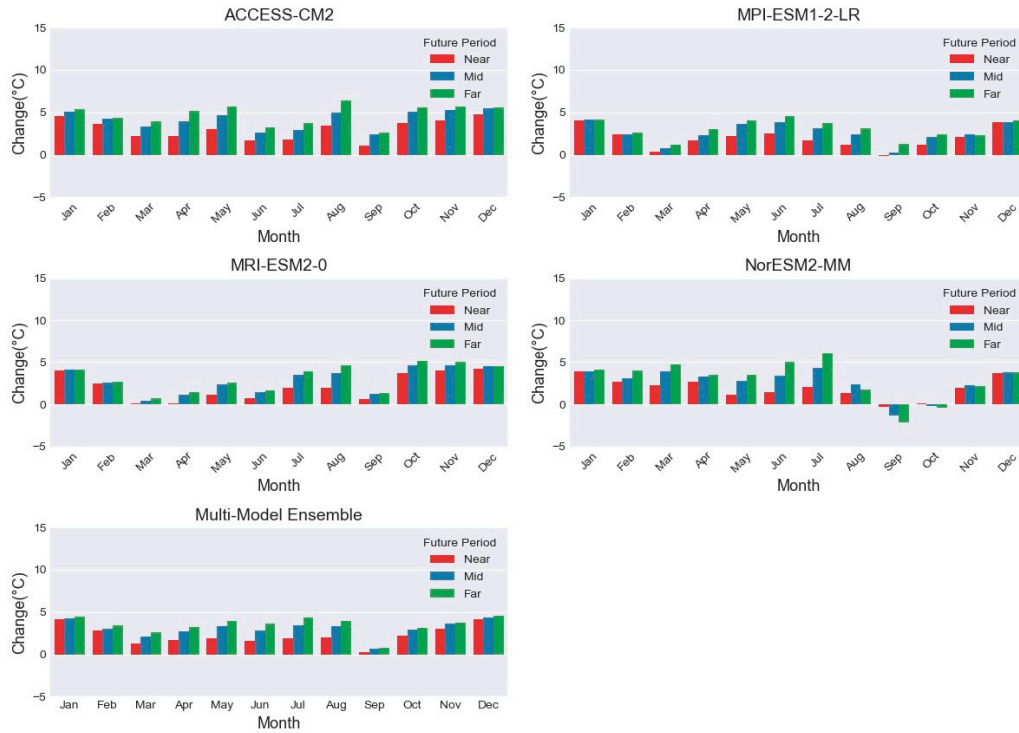

Monthly Change in Minimum Temperature at station 311 under ssp245

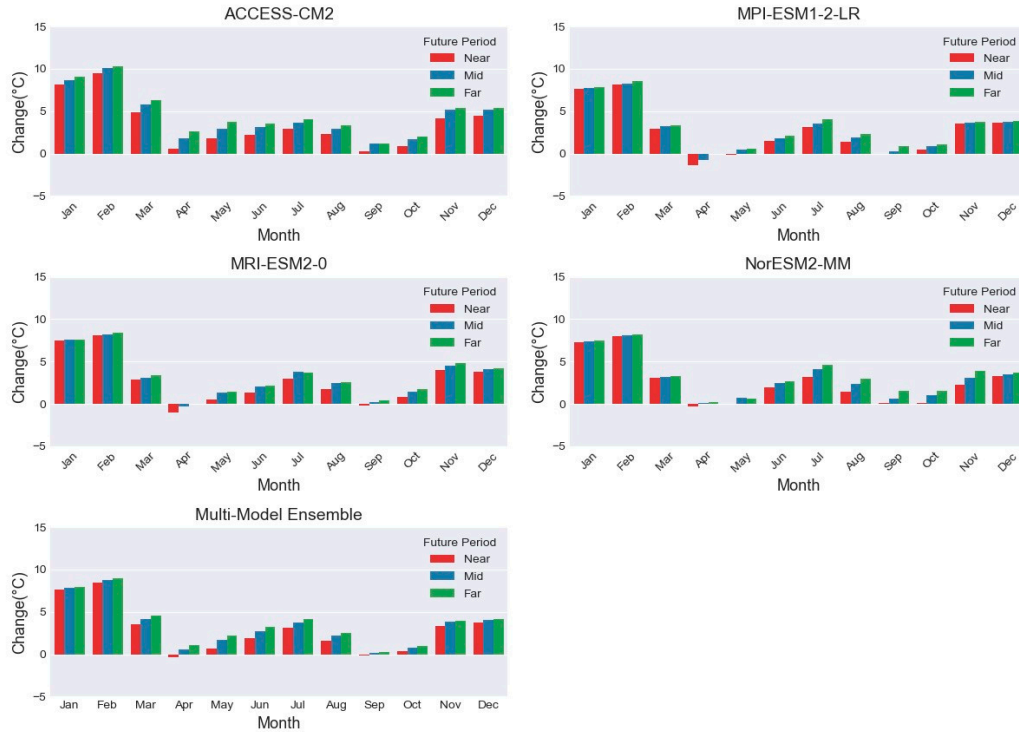

Monthly Change in Minimum Temperature at station 312 under ssp245

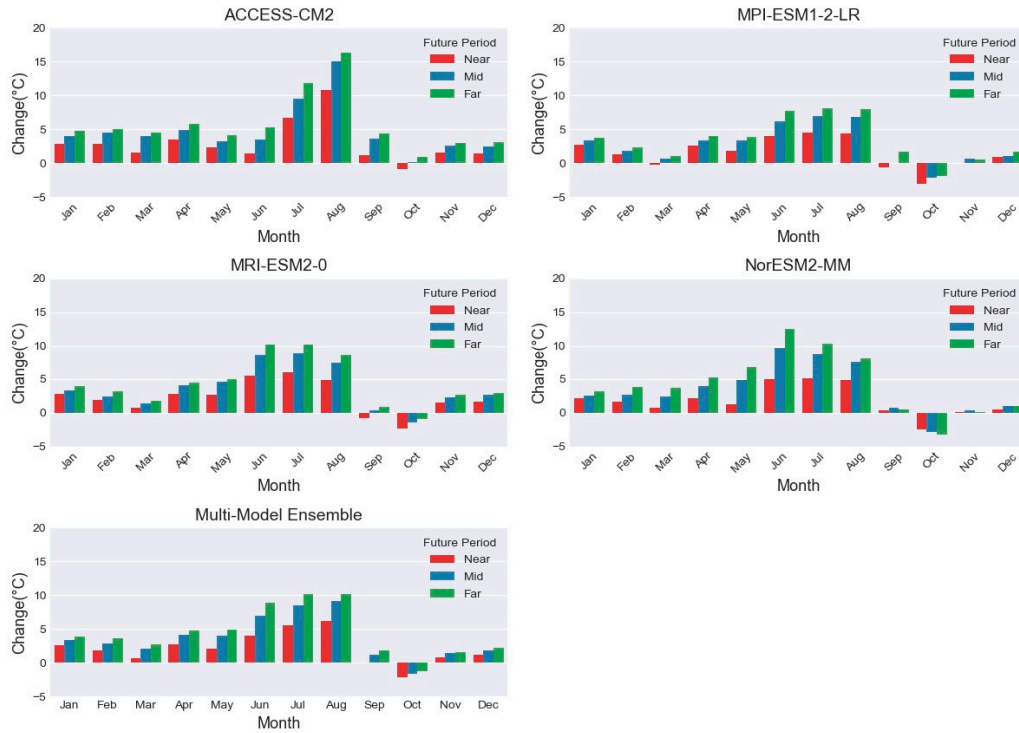

Monthly Change in Minimum Temperature at station 401 under ssp245

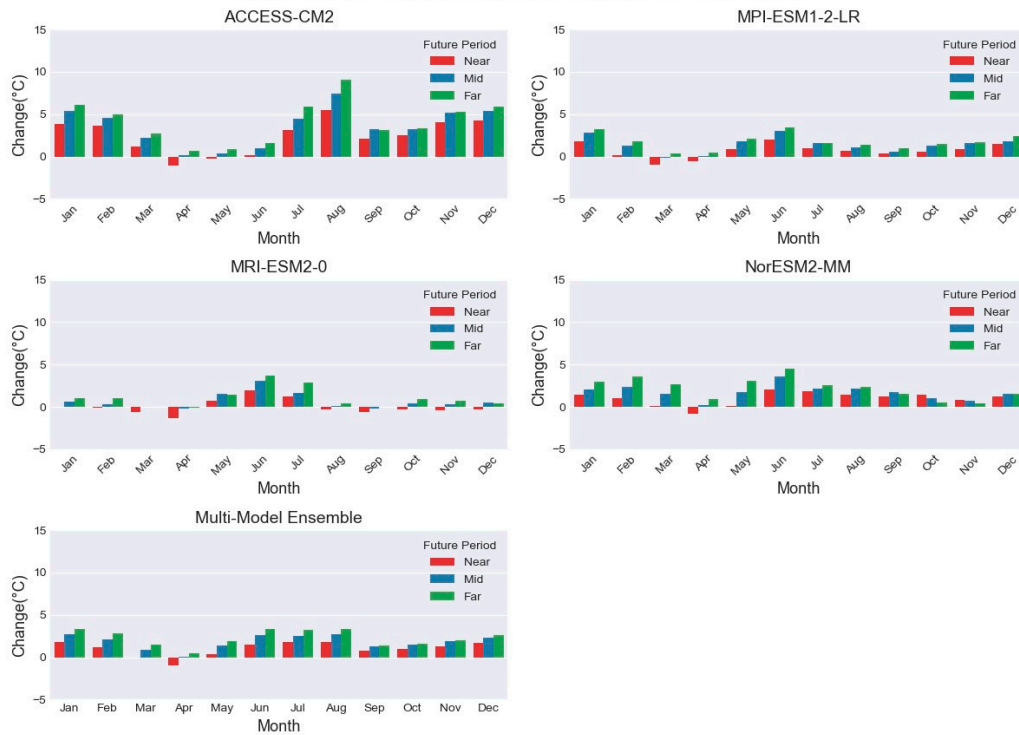



Monthly Change in Minimum Temperature at station 402 under ssp245

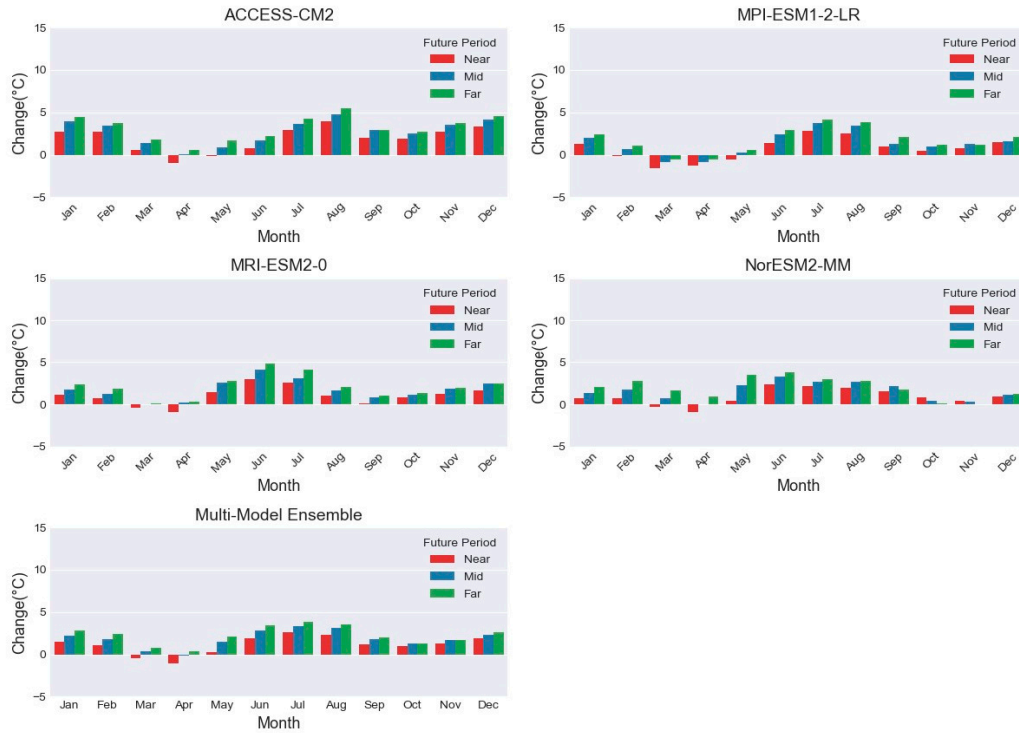

Monthly Change in Minimum Temperature at station 406 under ssp245

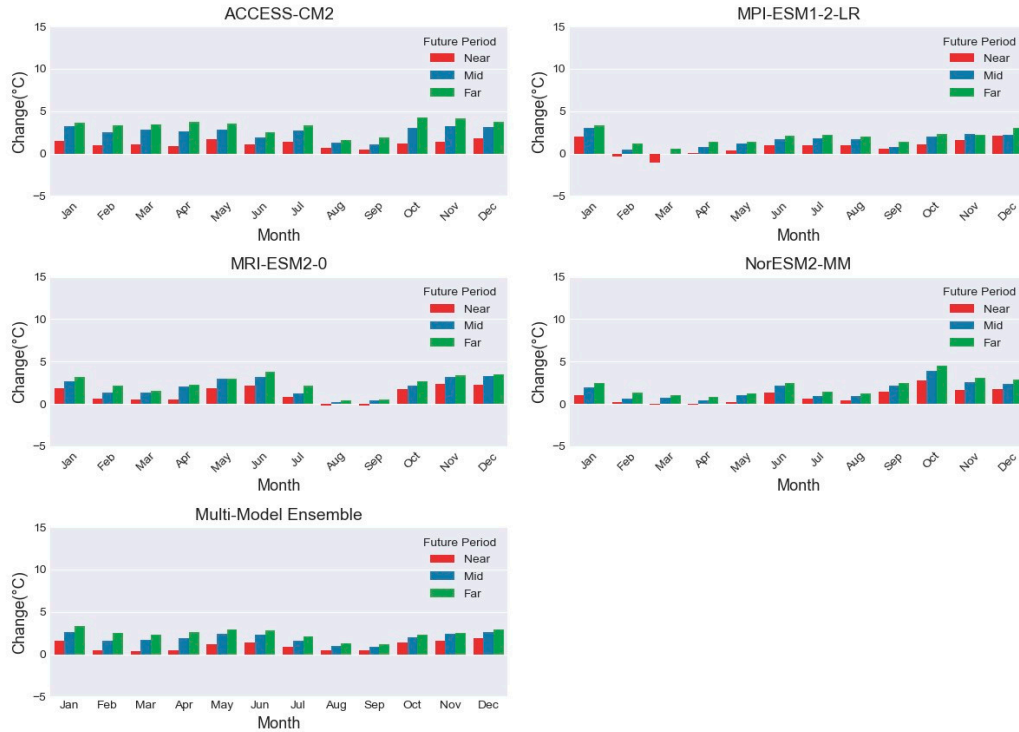

Monthly Change in Minimum Temperature at station 514 under ssp245

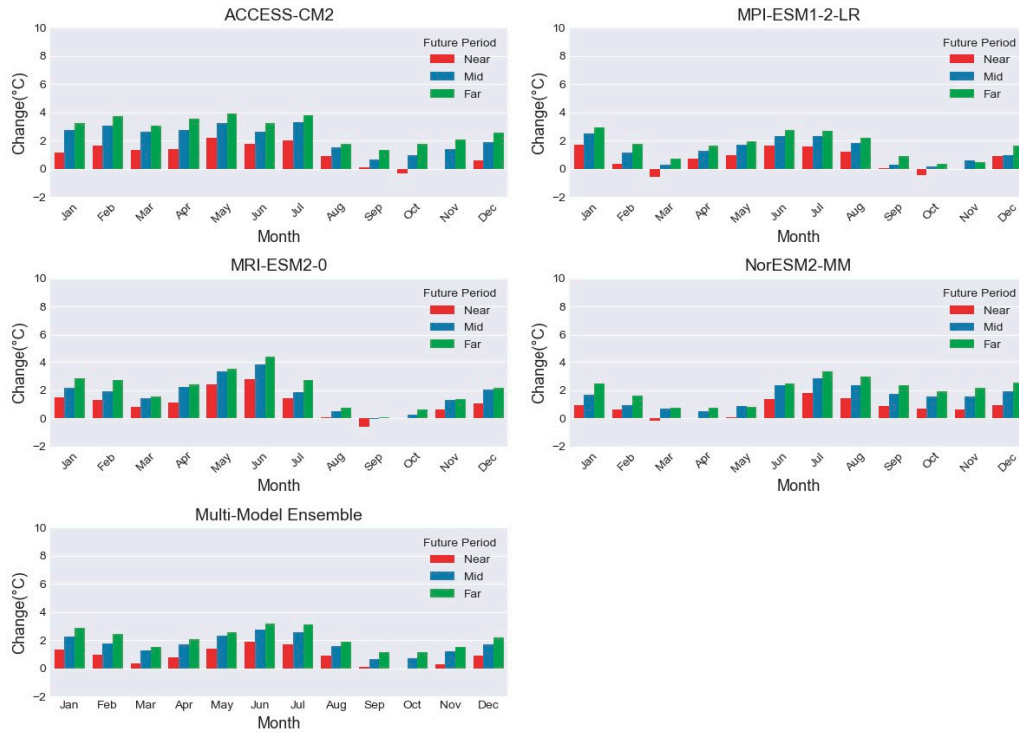

Monthly Change in Minimum Temperature at station 310 under ssp585

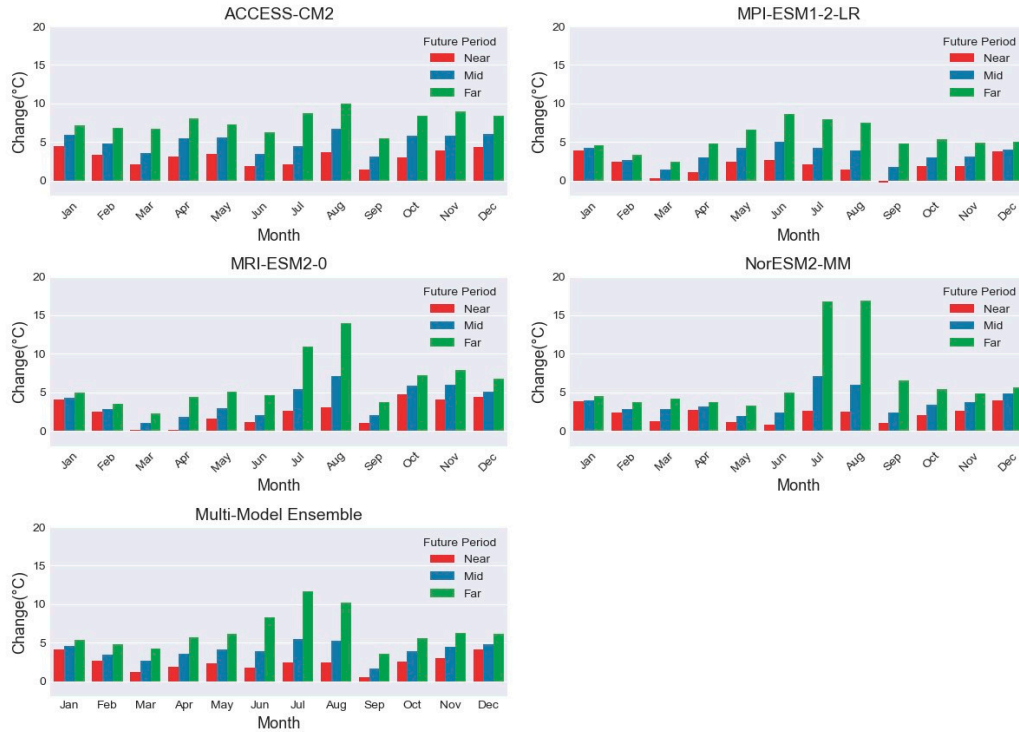



Monthly Change in Minimum Temperature at station 312 under ssp585

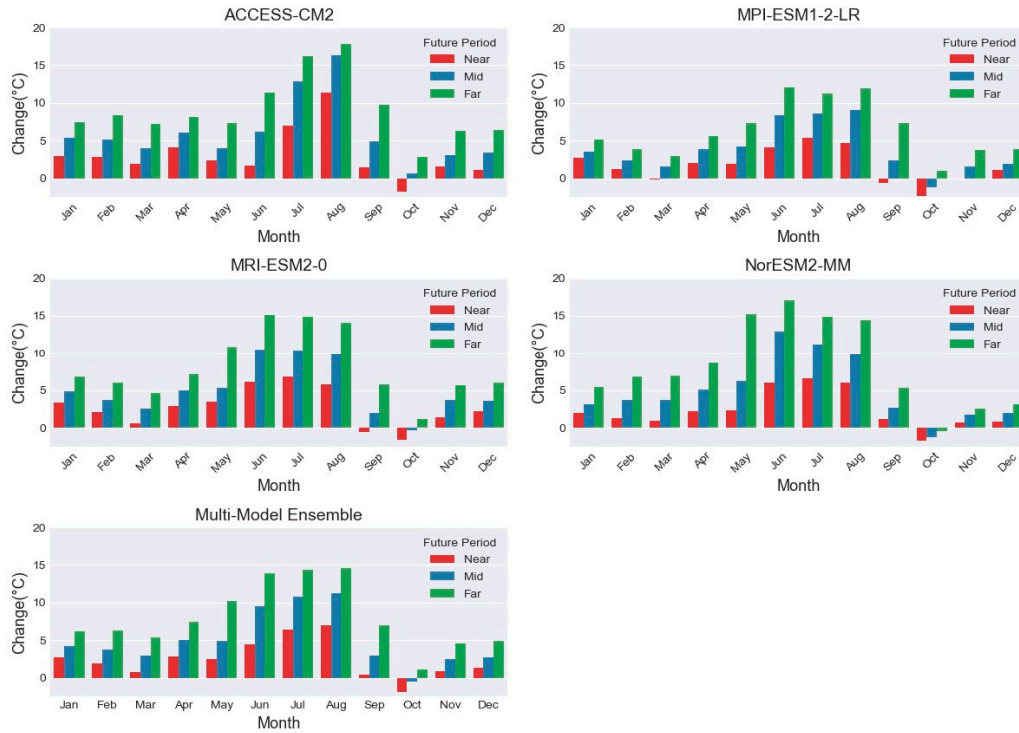

Monthly Change in Minimum Temperature at station 401 under ssp585

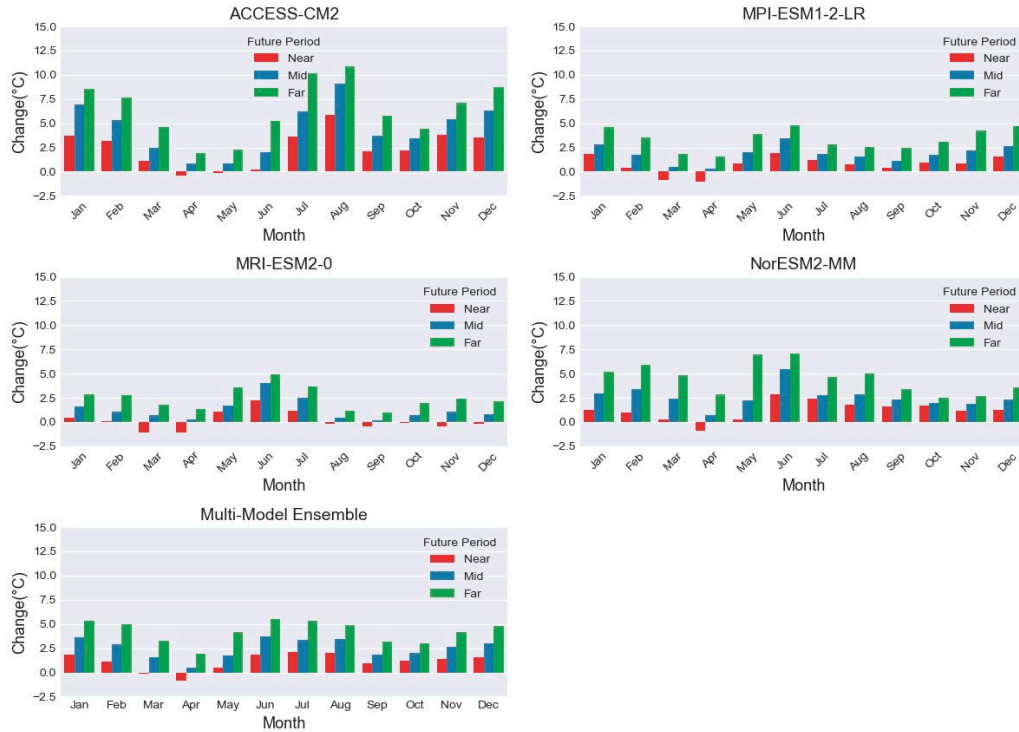

Monthly Change in Minimum Temperature at station 402 under ssp585

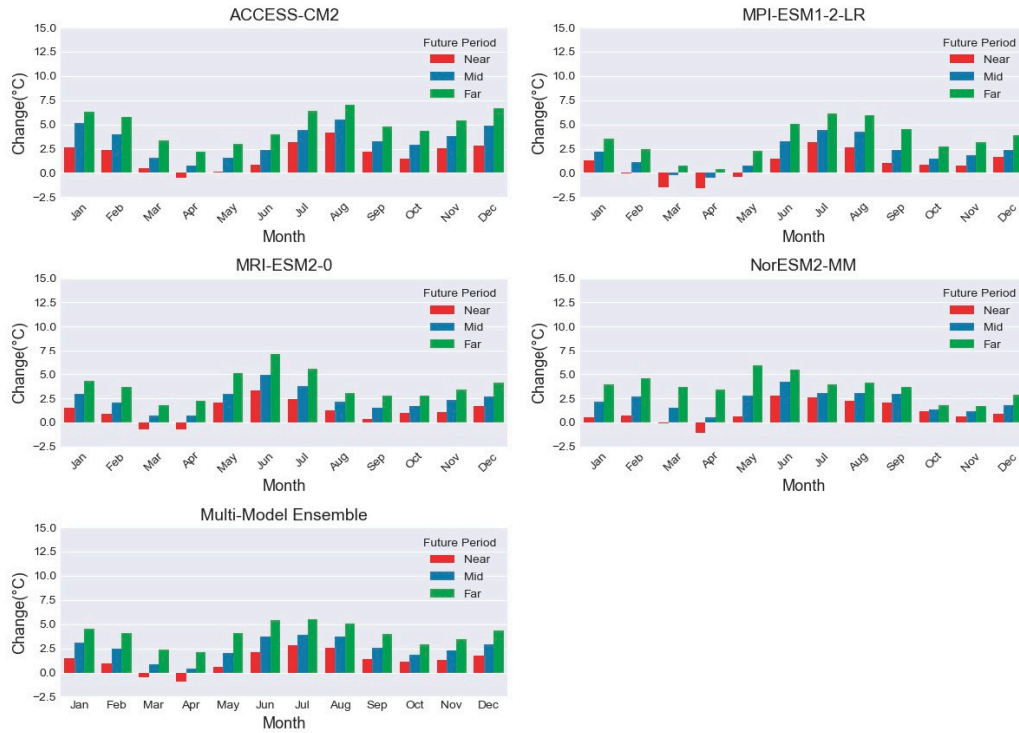

Monthly Change in Minimum Temperature at station 406 under ssp585

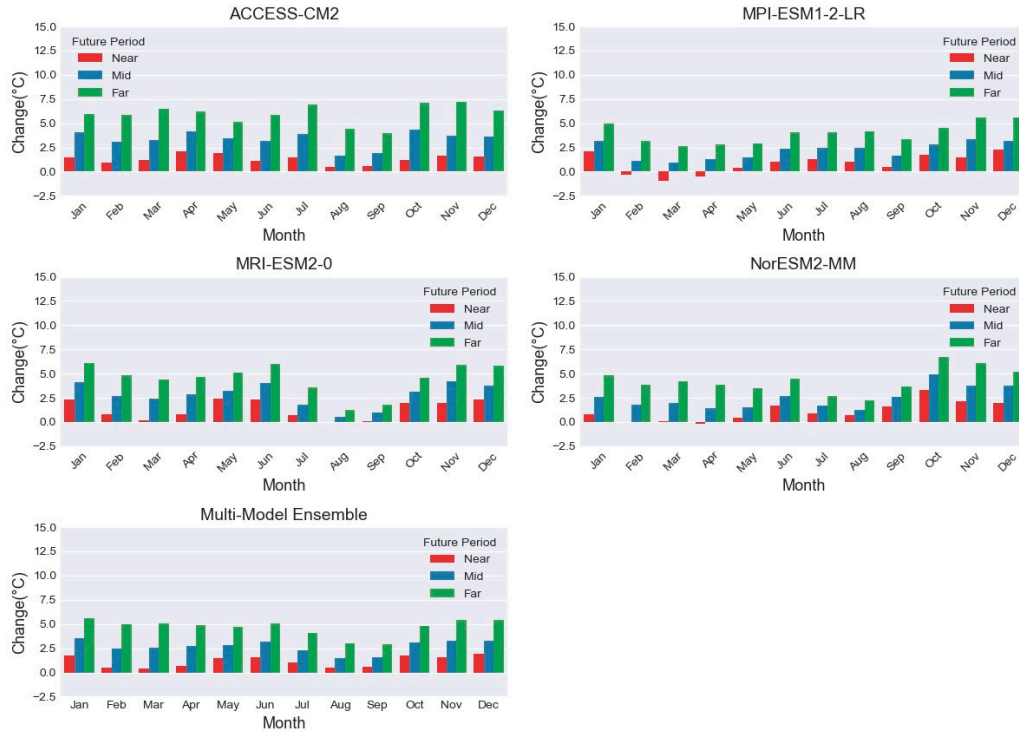

Monthly Change in Minimum Temperature at station 514 under ssp585

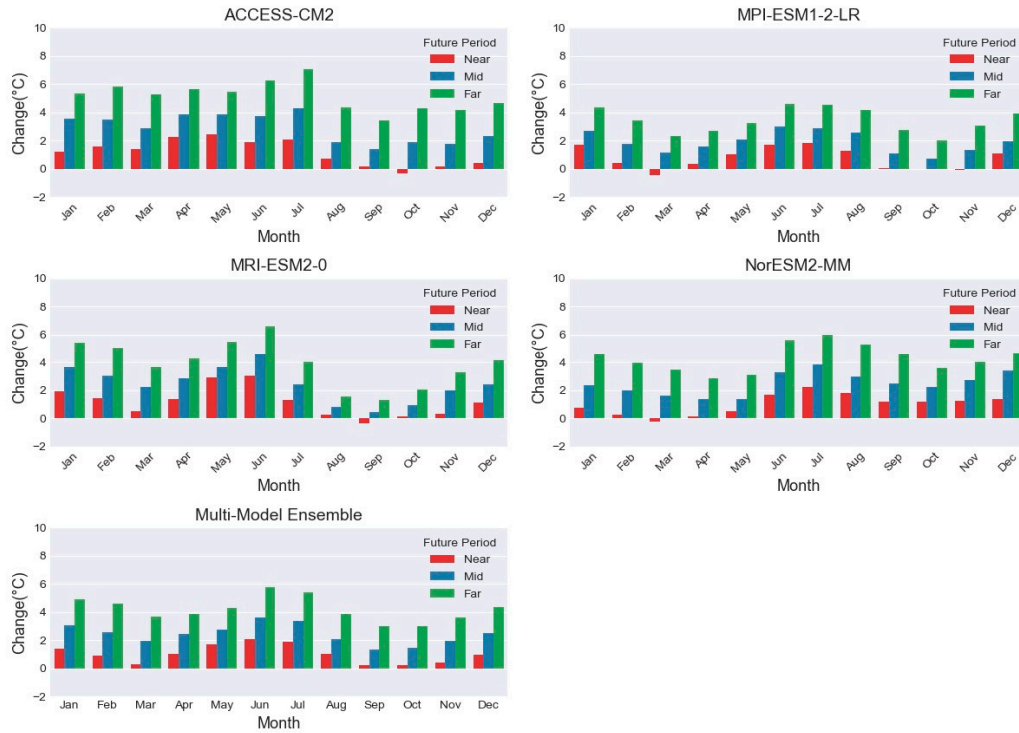

Monthly Change in Minimum Temperature at station 311 under ssp585

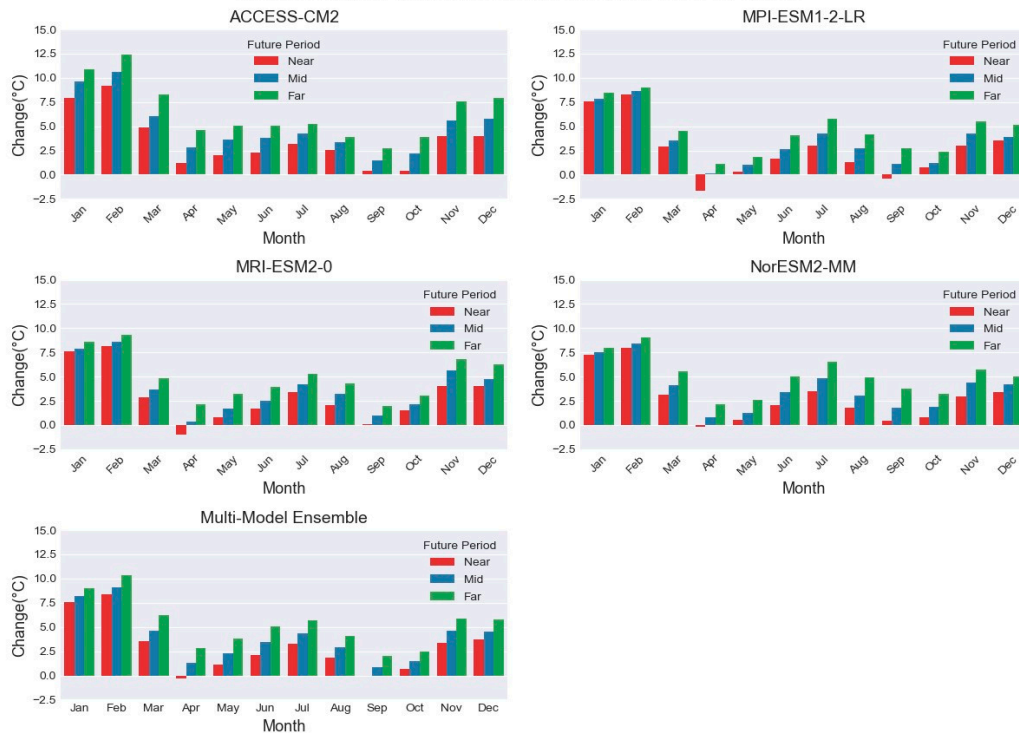

Supplement: s1 [file s1]
