# Supplementary material
Source: MDPI journal article supplement (https://www.mdpi.com/2071-1050/16/8/3262)
Supplement: s1 [file s1]

**Table S1.** Seasonal trend of BFI range in KRB

|            |      | Pre-Monsoon | Monsoon   | Post-Monsoon | Winter    |
|------------|------|-------------|-----------|--------------|-----------|
| Historical |      | 0.69-0.81   | 0.62-0.91 | 0.93-0.97    | 0.82-0.94 |
| SSP245     | Near | 0.54-0.84   | 0.63-0.95 | 0.87-0.99    | 0.81-0.97 |
|            | Mid  | 0.60-0.82   | 0.65-0.94 | 0.87-0.99    | 0.82-0.96 |
|            | Far  | 0.62-0.81   | 0.66-0.97 | 0.87-0.99    | 0.80-0.97 |
| SSP585     | Near | 0.57-0.83   | 0.63-0.95 | 0.88-0.99    | 0.81-0.97 |
|            | Mid  | 0.61-0.83   | 0.62-0.95 | 0.88-0.99    | 0.82-0.96 |
|            | Far  | 0.62-0.80   | 0.64-0.96 | 0.88-0.99    | 0.82-0.97 |

**Table S2.** Monthly BFI for 5 watersheds

| STATION     |          | FUTURE PERIODS | JAN  | FEB  | MAR  | APR  | MAY  | JUN  | JUL  | AUG  | SEP  | OCT  | NOV  | DEC  |
|-------------|----------|----------------|------|------|------|------|------|------|------|------|------|------|------|------|
| Asarghat    | Observed |                | 0.84 | 0.82 | 0.78 | 0.74 | 0.71 | 0.70 | 0.69 | 0.77 | 0.90 | 0.96 | 0.95 | 0.89 |
|             | SSP245   | Near           | 0.85 | 0.83 | 0.77 | 0.72 | 0.71 | 0.64 | 0.78 | 0.87 | 0.95 | 0.95 | 0.88 | 0.86 |
|             |          | Mid            | 0.84 | 0.82 | 0.80 | 0.68 | 0.67 | 0.69 | 0.78 | 0.84 | 0.96 | 0.95 | 0.88 | 0.86 |
|             |          | Far            | 0.84 | 0.80 | 0.80 | 0.70 | 0.63 | 0.72 | 0.79 | 0.82 | 0.97 | 0.95 | 0.87 | 0.86 |
|             | SSP585   | Near           | 0.84 | 0.82 | 0.77 | 0.72 | 0.67 | 0.63 | 0.78 | 0.87 | 0.95 | 0.95 | 0.88 | 0.86 |
|             |          | Mid            | 0.84 | 0.82 | 0.79 | 0.69 | 0.65 | 0.67 | 0.81 | 0.84 | 0.95 | 0.96 | 0.88 | 0.86 |
| Far         |          | 0.84           | 0.82 | 0.76 | 0.68 | 0.64 | 0.74 | 0.79 | 0.81 | 0.96 | 0.96 | 0.89 | 0.86 |      |
| Benighat    | Observed |                | 0.83 | 0.82 | 0.79 | 0.74 | 0.72 | 0.70 | 0.66 | 0.77 | 0.90 | 0.97 | 0.93 | 0.87 |
|             | SSP245   | Near           | 0.84 | 0.82 | 0.78 | 0.75 | 0.70 | 0.63 | 0.75 | 0.86 | 0.93 | 0.95 | 0.87 | 0.85 |
|             |          | Mid            | 0.84 | 0.83 | 0.79 | 0.71 | 0.69 | 0.65 | 0.78 | 0.83 | 0.94 | 0.95 | 0.87 | 0.85 |
|             |          | Far            | 0.83 | 0.82 | 0.80 | 0.69 | 0.66 | 0.69 | 0.79 | 0.81 | 0.95 | 0.95 | 0.87 | 0.86 |
|             | SSP585   | Near           | 0.84 | 0.83 | 0.79 | 0.74 | 0.68 | 0.64 | 0.74 | 0.87 | 0.93 | 0.95 | 0.88 | 0.85 |
|             |          | Mid            | 0.84 | 0.82 | 0.79 | 0.71 | 0.67 | 0.64 | 0.79 | 0.84 | 0.93 | 0.96 | 0.88 | 0.85 |
| Far         |          | 0.84           | 0.82 | 0.78 | 0.70 | 0.64 | 0.70 | 0.80 | 0.81 | 0.93 | 0.96 | 0.88 | 0.85 |      |
| Chisapani   | Observed |                | 0.87 | 0.87 | 0.81 | 0.70 | 0.70 | 0.69 | 0.69 | 0.77 | 0.91 | 0.97 | 0.96 | 0.93 |
|             | SSP245   | Near           | 0.91 | 0.83 | 0.79 | 0.70 | 0.64 | 0.67 | 0.70 | 0.83 | 0.92 | 0.99 | 0.97 | 0.96 |
|             |          | Mid            | 0.90 | 0.87 | 0.75 | 0.69 | 0.65 | 0.66 | 0.71 | 0.82 | 0.94 | 0.99 | 0.97 | 0.95 |
|             |          | Far            | 0.89 | 0.84 | 0.74 | 0.67 | 0.66 | 0.66 | 0.74 | 0.81 | 0.96 | 0.99 | 0.97 | 0.96 |
|             | SSP585   | Near           | 0.91 | 0.84 | 0.77 | 0.72 | 0.65 | 0.63 | 0.71 | 0.83 | 0.94 | 0.98 | 0.98 | 0.96 |
|             |          | Mid            | 0.91 | 0.85 | 0.76 | 0.69 | 0.64 | 0.62 | 0.73 | 0.83 | 0.94 | 0.99 | 0.98 | 0.95 |
| Far         |          | 0.90           | 0.84 | 0.80 | 0.66 | 0.62 | 0.64 | 0.76 | 0.81 | 0.95 | 0.99 | 0.98 | 0.96 |      |
| Rimna       | Observed |                | 0.88 | 0.84 | 0.78 | 0.74 | 0.69 | 0.67 | 0.63 | 0.77 | 0.90 | 0.93 | 0.93 | 0.94 |
|             | SSP245   | Near           | 0.89 | 0.81 | 0.81 | 0.54 | 0.77 | 0.72 | 0.73 | 0.82 | 0.87 | 0.98 | 0.99 | 0.97 |
|             |          | Mid            | 0.89 | 0.86 | 0.72 | 0.60 | 0.78 | 0.70 | 0.75 | 0.81 | 0.89 | 0.98 | 0.99 | 0.96 |
|             |          | Far            | 0.87 | 0.81 | 0.67 | 0.66 | 0.77 | 0.70 | 0.76 | 0.80 | 0.90 | 0.98 | 0.99 | 0.97 |
|             | SSP585   | Near           | 0.90 | 0.81 | 0.79 | 0.57 | 0.73 | 0.73 | 0.73 | 0.82 | 0.88 | 0.97 | 0.99 | 0.97 |
|             |          | Mid            | 0.89 | 0.84 | 0.71 | 0.61 | 0.77 | 0.69 | 0.74 | 0.81 | 0.89 | 0.98 | 0.99 | 0.96 |
| Far         |          | 0.89           | 0.82 | 0.62 | 0.75 | 0.73 | 0.67 | 0.76 | 0.81 | 0.89 | 0.98 | 0.99 | 0.97 |      |
| Samaijighat | Observed |                | 0.83 | 0.82 | 0.81 | 0.77 | 0.75 | 0.70 | 0.62 | 0.76 | 0.91 | 0.97 | 0.95 | 0.88 |
|             | SSP245   | Near           | 0.91 | 0.87 | 0.84 | 0.68 | 0.64 | 0.66 | 0.75 | 0.83 | 0.90 | 0.98 | 0.96 | 0.95 |
|             |          | Mid            | 0.91 | 0.88 | 0.82 | 0.64 | 0.66 | 0.67 | 0.76 | 0.82 | 0.91 | 0.98 | 0.96 | 0.95 |
|             |          | Far            | 0.90 | 0.85 | 0.81 | 0.62 | 0.66 | 0.69 | 0.78 | 0.81 | 0.92 | 0.98 | 0.96 | 0.95 |
|             | SSP585   | Near           | 0.91 | 0.87 | 0.83 | 0.71 | 0.63 | 0.64 | 0.75 | 0.84 | 0.91 | 0.98 | 0.97 | 0.95 |
|             |          | Mid            | 0.91 | 0.88 | 0.83 | 0.67 | 0.65 | 0.63 | 0.76 | 0.82 | 0.92 | 0.98 | 0.97 | 0.94 |
| Far         |          | 0.91           | 0.89 | 0.80 | 0.66 | 0.65 | 0.65 | 0.78 | 0.81 | 0.93 | 0.97 | 0.96 | 0.95 |      |
