# Supplementary material
Source: MDPI journal article supplement (https://www.mdpi.com/2071-1050/16/8/3262)
Supplement: s1 [file s1]

Archive with 4 entries (4 files):
- Figure S1.pdf
- Figure S2.pdf
- Figure S3.pdf
- Tables S1 &S2.pdf
